1 **Epigenomic mapping in B-cell acute lymphoblastic leukemia identifies**  
2 **transcriptional regulators and noncoding variants promoting distinct**  
3 **chromatin architectures**

4  
5 Kelly R. Barnett, PhD<sup>1,2</sup>, Robert J. Mobley, PhD<sup>1,2</sup>, Jonathan D. Diedrich, PhD<sup>1,2</sup>, Brennan P. Bergeron,  
6 PhD<sup>1,2,3</sup>, Kashi Raj Bhattarai, PhD<sup>1,2</sup>, Wenjian Yang, PhD<sup>1,2</sup>, Kristine R. Crews, PharmD<sup>1,2</sup>, Christopher  
7 S. Manring, MBA<sup>4</sup>, Elias Jabbour, MD<sup>5</sup>, Elisabeth Paietta, PhD<sup>6</sup>, Mark R. Litzow, MD<sup>7</sup>, Steven M.  
8 Kornblau, MD<sup>5</sup>, Wendy Stock, MD<sup>8</sup>, Hiroto Inaba, MD, PhD<sup>1,9</sup>, Sima Jeha, MD<sup>1,9</sup>, Ching-Hon Pui, MD<sup>1,9</sup>,  
9 Charles G. Mullighan, MBBS (Hons), MSc, MD<sup>1,10</sup>, Mary V. Relling, PharmD<sup>1,2</sup>, Jun J. Yang, PhD<sup>1,2,3,11</sup>,  
10 William E. Evans, PharmD<sup>1,2</sup> and Daniel Savic, PhD<sup>1,2,3,11,\*</sup>

11

12

13

14 <sup>1</sup> Hematological Malignancies Program, St. Jude Children's Research Hospital, Memphis, TN 38105, USA.

15 <sup>2</sup> Department of Pharmacy and Pharmaceutical Sciences, St. Jude Children's Research Hospital, Memphis, TN  
16 38105, USA.

17 <sup>3</sup> Graduate School of Biomedical Sciences, St. Jude Children's Research Hospital, Memphis, TN 38105, USA.

18 <sup>4</sup> Alliance Hematologic Malignancy Biorepository; Clara D. Bloomfield Center for Leukemia Outcomes Research,  
19 Columbus, OH 43210, USA

20 <sup>5</sup> Department of Leukemia, The University of Texas M. D. Anderson Cancer Center, Houston, TX, USA

21 <sup>6</sup> Department of Oncology, Montefiore Medical Center, Bronx, NY 10467, USA.

22 <sup>7</sup> Division of Hematology, Department of Medicine, Mayo Clinic, Rochester, MN 55905, USA.

23 <sup>8</sup> University of Chicago Comprehensive Cancer Center, Chicago, IL 60637, USA.

24 <sup>9</sup> Department of Oncology, St. Jude Children's Research Hospital, Memphis, TN 38105, USA.

25 <sup>10</sup> Department of Pathology, St. Jude Children's Research Hospital, Memphis, TN 38105, USA.

26 <sup>11</sup> Integrated Biomedical Sciences Program, University of Tennessee Health Science Center, Memphis, TN  
27 38105, USA.

28 \*Corresponding author:

Daniel Savic, PhD  
Division of Pharmaceutical Sciences  
Department of Pharmacy and Pharmaceutical Sciences  
St. Jude Children's Research Hospital  
262 Danny Thomas Place  
Memphis, TN, 38105  
[daniel.savic@stjude.org](mailto:daniel.savic@stjude.org)

34

35

36

37

38

**Key words:** Acute lymphoblastic leukemia, ATAC-seq, chromatin accessibility, gene regulation, gene regulatory network, transcription factor, transcription factor footprints, genetic variation, ATAC-QTLs

## 39 SUMMARY

40 B-cell lineage acute lymphoblastic leukemia (B-ALL) is comprised of diverse molecular subtypes and  
41 while transcriptional and DNA methylation profiling of B-ALL subtypes has been extensively examined,  
42 the accompanying chromatin landscape is not well characterized for many subtypes. We therefore  
43 mapped chromatin accessibility using ATAC-seq for 10 B-ALL molecular subtypes in primary ALL cells  
44 from 154 patients. Comparisons with B-cell progenitors identified candidate B-ALL cell-of-origin and  
45 AP-1-associated *cis*-regulatory rewiring in B-ALL. *Cis*-regulatory rewiring promoted B-ALL-specific gene  
46 regulatory networks impacting oncogenic signaling pathways that perturb normal B-cell development.  
47 We also identified that over 20% of B-ALL accessible chromatin sites exhibit strong subtype  
48 enrichment, with transcription factor (TF) footprint profiling identifying candidate TFs that maintain  
49 subtype-specific chromatin architectures. Over 9000 inherited genetic variants were further uncovered  
50 that contribute to variability in chromatin accessibility among individual patient samples. Overall, our  
51 data suggest that distinct chromatin architectures are driven by diverse TFs and inherited genetic  
52 variants which promote unique gene regulatory networks that contribute to transcriptional differences  
53 among B-ALL subtypes.

54

55

56

57

58

59

60

61

62

## 63 HIGHLIGHTS

- 64 • Pro-B progenitor cells as the most common cell-of-origin for B-ALL
- 65 • AP-1 TF-associated *cis*-regulatory rewiring in B-ALL
- 66 • Subtype-specific accessible chromatin signatures representing 20% of all B-ALL sites
- 67 • Role for distinct TFs in promoting subtype-specific chromatin architectures
- 68 • Thousands of inherited genetic variants identified impacting chromatin state

69

70

71

## 72 INTRODUCTION

73 Acute lymphoblastic leukemia (ALL) is derived from B- and T-cell lineage precursor cells and is the  
74 most common childhood cancer <sup>1</sup>. A majority of acute lymphoblastic leukemias are derived from B-cell  
75 lineages (B-ALL) that are comprised of distinct molecular subtypes characterized by unique  
76 chromosomal lesions, including aneuploidy, translocations, gene fusions, point mutations and other  
77 chromosomal rearrangements that drive leukemogenesis <sup>2</sup>. Numerous studies have identified extensive  
78 heterogeneity in transcriptomes <sup>3,4</sup> and DNA methylomes <sup>5,6</sup> among B-ALL subtypes in large patient  
79 cohorts, but there is limited understanding of chromatin landscapes. Here we provide an extensive  
80 survey of accessible chromatin state and *cis*-regulatory element activity in primary B-ALL cells from  
81 over 150 patients across the United States.

82 Chromatin accessibility or open chromatin is a hallmark of active *cis*-regulatory elements that  
83 control spatial and temporal gene expression <sup>7</sup>. Because ALL typically involves mutations (*PAX5*-  
84 altered), complex rearrangements (*DUX4*-rearranged, *PAX5*-altered, *ZNF384*-rearranged, etc.) and/or  
85 oncogenic gene fusions (*ETV6::RUNX1*, *TCF3::PBX1*, *KMT2A*-rearranged, etc.) of transcription factor  
86 (TF) genes as well as disruptions of *cis*-regulatory elements<sup>8</sup>, chromatin accessibility maps can provide  
87 valuable information to better understand the leukemogenic process. Accessible chromatin sites can be  
88 mapped using transposases by performing assay for transposase-accessible chromatin with high-  
89 throughput sequencing (ATAC-seq) <sup>9,10</sup>. Although DNase treatment has also been used <sup>11</sup>, one key  
90 advantage of ATAC-seq is the low sample input requirements compared to DNase-based assays. This  
91 makes ATAC-seq an attractive assay for mapping open chromatin in primary cells from patients  
92 wherein sample availability is limited. Additionally, chromatin accessibility allows for identification of  
93 bound TFs through an examination of TF footprints which are defined by a depletion in DNA  
94 transposition <sup>12</sup> or DNase <sup>13</sup> cleavage events within regions of accessible chromatin signal. As a result,  
95 the underlying TF-binding gene regulatory networks that promote chromatin accessibility and  
96 differential gene expression can be predicted.

97 Previous large-scale studies of chromatin accessibility in primary cells have predominantly  
98 focused on distinct cell types <sup>10,14</sup> or distinct tumor types and locations <sup>15,16</sup>. Therefore, large-scale  
99 analyses aimed to better understand chromatin state in a single heterogeneous malignancy are  
100 currently lacking. To address this knowledge gap, we mapped chromatin accessibility in fresh primary  
101 ALL cells from 154 patients across 10 molecular subtypes of B-ALL (*BCR::ABL1*, *DUX4*-rearranged,  
102 *ETV6::RUNX1*, high hyperdiploid, low hypodiploid, *KMT2A*-rearranged, *BCR::ABL1*-like (Ph-like),  
103 *PAX5*-altered, *TCF3::PBX1*, *ZNF384*-rearranged) and B-other patient samples. Notably, these  
104 subtypes span the entire spectrum of clinical prognoses, including patients with excellent (*DUX4*-  
105 rearranged, *ETV6::RUNX1*, high hyperdiploid), good (*TCF3::PBX1*), intermediate (*ZNF384*-rearranged,

106 *PAX5*-altered) and poor (*BCR::ABL1*, low hypodiploid, *KMT2A*-rearranged and Ph-like) prognosis. We  
107 also mapped histone H3 lysine 27 acetylation (H3K27ac) enrichment using ChIP-seq in a subset of  
108 these patient samples to additionally infer functional activity.

109 Using ATAC-seq chromatin accessibility and histone profiling in primary ALL cells, we mapped  
110 *cis*-regulatory element activity in B-ALL. In complement to chromatin accessibility profiling, we identified  
111 thousands of chromatin loops targeting promoters in multiple B-ALL cell lines to better inform linkages  
112 of *cis*-regulatory elements to cognate genes. We coupled these maps to transcription factor (TF)  
113 footprints at accessible chromatin sites to identify key TFs and gene regulatory networks across B-ALL  
114 samples and within distinct B-ALL subtypes. Our results identified extensive chromatin reprogramming  
115 between B-cell progenitors and B-ALL, as well as extensive heterogeneity in accessible chromatin  
116 landscapes among B-ALL subtypes. Specifically, we uncovered a focused subset of over 42,000 B-ALL  
117 open chromatin sites exhibiting extensive subtype-enrichment and subtype-enriched TF binding events.  
118 Notably, these sites can predict and classify B-ALL samples with 86% cross-validation accuracy. We  
119 additionally explored the impact of inherited genetic variation on chromatin state and delineated over  
120 9000 ATAC-seq chromatin accessibility quantitative trait loci (ATAC-QTLs) in B-ALL cells, including a  
121 subset that alter neighboring gene expression. Using the largest accessible chromatin accessibility  
122 dataset for B-ALL to date, our data collectively support substantial subtype-specificity in chromatin  
123 accessibility that is driven in part by distinct TFs, as well as pronounced inter-individual heterogeneity in  
124 chromatin state through inherited genetic variants. Our work further supports the role of these distinct  
125 chromatin architectures in establishing unique gene regulatory networks that impact gene expression  
126 and B-ALL cell biology.

127

128

129

## 130 RESULTS

### 131 Chromatin accessibility profiles of B-ALL patient samples spanning multiple subtypes

132 ATAC-seq using the Fast-ATAC<sup>10</sup> method was performed on recently-harvested primary ALL cells from  
133 154 patients spanning 10 B-ALL molecular subtypes (*BCR::ABL1*, *DUX4*-rearranged, *ETV6::RUNX1*,  
134 high hyperdiploid, low hypodiploid, *KMT2A*-rearranged, Ph-like, *PAX5*-altered, *TCF3::PBX1*, *ZNF384*-  
135 rearranged) and B-other samples (**Table S1**) from diverse medical centers, research groups and  
136 clinical trials networks across the United States (see **Methods**). To identify high-confidence sites, we  
137 identified ATAC-seq peak summits using subtype merged data and selected only loci reproducible  
138 among unmerged individual patients. Using this approach we identified 110,468 accessible chromatin

139 fsites, on average, in each B-ALL subtype (range= 71,797–142,498), with 217,240 merged sites  
140 identified in total representing the final genomic regions of interest (**Figure 1A, Table S2**).

141 Using H3K27ac ChIP-seq data generated from a subset of 11 B-ALL patient samples, as well as  
142 primary B-ALL cell H3K27ac, H3K4me1 and H3K27me3 ChIP-seq data from the Blueprint Epigenome  
143 Consortium (<https://www.blueprint-epigenome.eu/>), we determined that nearly all open chromatin sites  
144 mapped to regions containing only active histone marks (H3K27ac and/or H3K4me1, 89.6%;  
145 H3K27ac= 3.3%, H3K4me1=34% and H3K4me1+H3K27ac=52.3%) or regions with bivalent marks  
146 suggesting a poised chromatin state (H3K27ac and/or H3K4me1 and H3K27me3, 8.9%), compared to  
147 only 1.5% of ATAC-seq sites that mapped to regions solely harboring repressive chromatin  
148 (H3K27me3; **Figure 1B**). Because these histone modifications are typically found at transcriptional  
149 enhancers and promoters<sup>17-20</sup>, these findings suggest that these accessible chromatin regions are B-  
150 ALL *cis*-regulatory elements implicated in gene regulation.

151 In most cases, these candidate *cis*-regulatory elements map within intergenic or intragenic loci  
152 with unclear gene targets. Therefore, to better inform gene connectivity we produced chromatin looping  
153 data using promoter capture Hi-C<sup>21</sup> across seven B-ALL cell lines (697, BALL1, Nalm6, REH, RS411,  
154 SEM and SUPB15) to complement B-ALL patient chromatin accessibility profiles. Collectively, across  
155 the B-ALL cell lines we detected approximately 400,000 chromatin loops, with approximately 50% of  
156 the 217,240 chromatin accessible regions of interest intersecting with a promoter loop, including 15,929  
157 chromatin accessible sites that looped to a cancer implicated gene set (**Figure 1C**)<sup>22,23</sup>. In many  
158 instances, large domains of extensive chromatin looping are present, which with chromatin accessibility  
159 and active histone marks emphasize the gene regulatory networks present across B-ALL patient  
160 samples (e.g., **Figures 1D and 1E**).

161

### 162 **Chromatin accessibility identifies Pro-B cell-of-origin for most B-ALL patient samples**

163 To better understand chromatin remodeling during leukemogenesis we sought a comparison of  
164 chromatin accessibility between B-ALL and B-cell progenitors. Moreover, although it is widely accepted  
165 that the B-ALL cell-of-origin is a B-cell precursor, exactly which precursor is not always clear,  
166 particularly at the chromatin accessibility level<sup>24</sup>. To resolve this uncertainty, we examined publicly  
167 available ATAC-seq data from several human B-cell progenitors<sup>10,25</sup> (**Figure 2A**). When comparing  
168 chromatin accessibility signal between B-cell progenitor groups, we identified a set of approximately  
169 42,344 genomic loci which demonstrate a chromatin accessibility enrichment or depletion trend for a B-  
170 cell progenitor (**Figure 2B, Table S3**). We refer to these chromatin loci as B-progenitor identity loci due  
171 their distinct patterning across B-progenitor differentiation and are likely representations of stage-  
172 specific gene regulatory programs.

173 Next, we examined patient B-ALL cell chromatin accessibility across these B-progenitor identity  
174 loci. When plotting chromatin accessibility signal as a heatmap comparing B-cell progenitors and B-ALL  
175 patient samples, a high degree of similarity was observed with prePro-B cells and Pro-B cells (**Figure**  
176 **2B**). Further, when applying the K-nearest neighbor classification model previously trained on B-  
177 progenitor identity loci the majority of B-ALL samples classified as either prePro-B or Pro-B (**Figures**  
178 **2C** and **2D**). However, prePro-B cells have been reported to be an extremely rare population beyond  
179 embryonic and fetal development<sup>25</sup>. Overall, Pro-B cells demonstrate the most similarity to B-ALL cells  
180 at the chromatin accessibility level when focusing specifically on B-cell precursor defining loci,  
181 emphasizing this precursor B-cell as a common cell-of-origin for B-ALL.

182

### 183 **Extensive differences in chromatin accessibility between B-ALL and Pro-B cells**

184 To better understand chromatin remodeling during leukemogenesis we next compared accessible  
185 chromatin sites between B-ALL and Pro-B cells (n=3) and uncovered 42,661 differentially accessible  
186 chromatin sites (DAS) exhibiting lesser or greater accessibility in B-ALL samples (**Figures 3A** and **3B**;  
187 **Figure S1** and **Table S4**). Ontology analysis focusing strictly on DAS with higher chromatin  
188 accessibility in B-ALL indicated an enrichment for sites associated with genes involved with toll-like  
189 receptor signaling, interleukin production, metabolism (acetyl-CoA production) and cell proliferation  
190 (**Figure 3C**). Enriched ontology terms were frequently present at multiple fold change thresholds of  
191 input B-ALL DAS (**Table S5**).

192 In addition to profiling differential chromatin accessibility, global transcription factor (TF) binding  
193 was also compared between B-ALL and Pro-B cells. To identify differential TF binding, we performed  
194 genome-wide TF footprint profiling<sup>12</sup> using 810 TF motifs comparing B-ALL patient samples and normal  
195 Pro-B cell samples across all B-ALL genomic regions of interest (217,240 regions). Differential binding  
196 scores indicated the AP-1 family of TFs (e.g., FOS, JUN) as the most prominent TFs with higher  
197 binding in B-ALL patient samples compared to normal Pro-B cells (**Figure 3D**). In contrast, prominent  
198 TFs with higher binding in Pro-B cells were TFs such as TFAP2A, KLF15, CTCFL, ZBTB14 and EBF1.

199 To further demonstrate AP-1 TF occupancy in B-ALL accessible chromatin sites we performed  
200 CUT&RUN for FOSL2, JUN and JUNB in 697 and SUB15 human B-ALL cell lines (**Figure 3E**; **Figure**  
201 **S2**). Intersections with B-ALL accessible chromatin sites from primary cells identified that 27% of these  
202 sites were occupied by an AP-1 TF in B-ALL cell lines. Strikingly, our results further uncovered that  
203 45% of DAS with higher chromatin accessibility in B-ALL (i.e., B-ALL enriched DAS) also exhibit AP-1  
204 TF occupancy (**Figure 3F**), thereby supporting AP-1-associated *cis*-regulatory rewiring in B-ALL. We  
205 determined that even though most AP-1 occupied B-ALL enriched DAS localized to promoter-distal  
206 regions of the human genome (77%), there is a 2.7-fold enrichment for AP-1 occupancy at B-ALL

207 enriched promoters compared to B-ALL enriched DAS devoid of AP-1 occupancy (**Figure 3G**; 16% vs  
208 6%). Further integration of AP-1 occupied B-ALL enriched DAS with promoter capture Hi-C in B-ALL  
209 cell lines identified target genes that were enriched for cell cycle, autophagy and apoptotic signaling  
210 pathways (**Table S6**; example in **Figure 3H**).

211 As an extension of our TF footprinting data we also integrated B-ALL cell line promoter capture  
212 Hi-C using the ABC enhancer algorithm to refine identification of TF-target gene relationships across  
213 top TFs and a cancer implicated gene set<sup>26</sup>. Specifically, we focused on top TF footprints within B-ALL  
214 enriched DAS and the cancer implicated gene targets of these DAS predicted by the ABC enhancer  
215 algorithm. Concordant with global TF footprint and AP-1 TF occupancy analyses we identified the AP-1  
216 family as top TFs in this network. We also identified other top TFs from TF footprinting such as CEBP  
217 family TFs and BACH2 (**Figure 3I**). Other prominent top TFs include NFIC, XBP1, TBX1 and numerous  
218 basic helix-loop-helix (bHLH) class TFs (e.g., MYOG, MYF5 and HES5). Top expressed cancer  
219 implicated gene targets for each TF converged on notable genes involved in cell signaling (*TGFBR2*,  
220 *CXCR4*), histone mark modification (*ARID5B*), transcriptional regulation (*MYC*, *KLF6*, *HIF1A*) and the  
221 PI3K-AKT pathway (*PTEN*) (**Figure 3I**). Collectively, these results highlight a rewiring of signaling  
222 pathways and TF binding networks that facilitate the proliferative potential of B-ALL samples compared  
223 to Pro-B cells.

224

### 225 **Identification of subtype-enriched chromatin architecture**

226 To better understand chromatin accessibility within B-ALL, inter-subtype analyses were performed to  
227 identify DAS exhibiting subtype-enriched signal (i.e., henceforth referred to as subtype-enriched DAS)  
228 in 10 B-ALL molecular subtypes harboring known molecular drivers (*BCR::ABL1*, *DUX4*-rearranged,  
229 *ETV6::RUNX1*, high hyperdiploid, low hypodiploid, *KMT2A*-rearranged, Ph-like, *PAX5*-altered,  
230 *TCF3::PBX1* and *ZNF384*-rearranged; **Figures 4A** and **4C**). For this analysis, we compared a single B-  
231 ALL subtype cohort with all other B-ALL cell samples not belonging to that subtype in pairwise fashion  
232 covering all subtypes. This approach was utilized to emphasize high degrees of subtype enrichment  
233 compared to the full spectrum of chromatin accessibility variability in the remaining sample cohort. We  
234 identified between 307 and 10,639 DAS in each B-ALL subtype, with a total of 42,457 subtype-enriched  
235 DAS identified across all 10 B-ALL subtypes ( $\log_2$  fold change > or < 1, FDR<0.05; **Figure 4B**, **Table**  
236 **S7**). We annotated subtype-enriched DAS on a subtype basis and determined that a majority of  
237 subtype-enriched DAS in each B-ALL subtype (87%, range=80%-90%) localized to promoter-distal  
238 regions of the genome (intronic and distal intergenic; **Figure 4D**), and 43%, on average (range=39%-  
239 49%), localized to distal intergenic regions, thereby emphasizing the importance of non-genic loci in  
240 defining B-ALL chromatin heterogeneity.

241 To further evaluate subtype-enriched DAS, we determined if they displayed enrichment patterns  
242 that were consistent with five established human B-ALL cell lines (697= *TCF3::PBX1*, Nalm6= *DUX4*-  
243 rearranged, REH= *ETV6::RUNX1*, SEM= *KMT2A*-rearranged and SUPB15= *BCR::ABL1*). Concordant  
244 with DAS in patient samples, subtype-enriched DAS exhibited the strongest (*BCR-ABL*, *DUX4*-  
245 rearranged, *ETV6::RUNX1*, *KMT2A*-rearranged) or second strongest (*TCF3::PBX1*) accessibility in the  
246 concordant cell line that was representative of that subtype (**Figure S3**). These data suggest that B-  
247 ALL cell lines exhibit chromatin accessibility that is largely consistent with primary B-ALL cell sample  
248 from the corresponding subtype.

249 To further determine functional effects on gene expression, we integrated subtype-enriched  
250 DAS with DEGs uniquely up-regulated ( $\log_2$  fold change  $>1$ , FDR $<0.05$ ) in each of the 10 B-ALL  
251 molecular subtypes to determine if they were enriched near DEGs. We identified a statistically  
252 significant enrichment of subtype-enriched DAS near up-regulated DEGs in 9 of 10 subtypes compared  
253 to total expressed genes in the corresponding subtype (Kolmogorov-Smirnov test  $p < 0.05$ ; **Figure 4E**,  
254 **Figure S4**) and uncovered a strong statistical trend in Ph-like B-ALL (Kolmogorov-Smirnov test  $p =$   
255  $0.06$ ; **Figure S4**). Consequently, these data support the role of subtype-enriched DAS in gene  
256 regulation and gene activation and further suggest that differences in chromatin accessibility contribute  
257 to transcriptomic differences among B-ALL subtypes<sup>3,4</sup>. Collectively, these results highlight extensive  
258 open chromatin heterogeneity among B-ALL molecular subtypes.

259

### 260 **Mapping transcription factor drivers and gene regulatory networks in B-ALL subtypes**

261 We performed TF footprint profiling using merged ATAC-seq signal from 10 B-ALL subtypes with  
262 known molecular drivers to identify subtype-enriched TF drivers. TF footprint profiling<sup>12</sup> identified  
263 between 4,303,155 and 5,441,937 bound motifs in each B-ALL subtype, with 49,402,067 TF footprints  
264 at 815,992 unique genomic loci identified across all subtypes. Using these data, we next identified key  
265 TF footprints that were enriched in each subtype (i.e., subtype-enriched TF footprints) by calculating  
266 differential footprint scores between every subtype-subtype pair for each TF motif. The top median  
267 differential motif scores for each subtype were selected as subtype-enriched TF footprints. This  
268 approach was utilized to emphasize differential TF footprint motifs that were consistent and distinct for  
269 each subtype rather than repetitive global trends (**Figure 5A**). Notably, subtype-enriched TF footprints  
270 were identified for recognized TF drivers such as *DUX4* in *DUX4*-rearranged ALL and *ZNF384* in  
271 *ZNF384*-rearranged ALL. We also identified HOX family TFs (*HOXA9*, *HOXB9*, *HOXC9* and *HOXD9*) in  
272 *KMT2A*-rearranged ALL, GATA family TFs (*GATA2*, *GATA3*, *GATA4*, *GATA5* and *GATA6*) in *ZNF384*-  
273 rearranged ALL and nuclear receptor family TFs in *PAX5*-altered ALL (*ESR1*, *ESR2*, *ESRRA*, *NR2F6*,  
274 *NR2F1*, *RARA* and *THRB*) that all had strong subtype-enriched TF footprints.



275 Because DNA consensus motifs can be highly redundant within TF families, we integrated  
276 subtype-enriched TF footprints with DEGs uniquely up-regulated in each subtype to identify candidate  
277 TFs from these TF families that are up-regulated in the corresponding B-ALL subtype. This analysis  
278 identified *HOXA9* and *HOXC9*, *RARA* and *GATA3* as up-regulated genes in *KMT2A*-rearranged, *PAX5*-  
279 altered and *ZNF384*-rearranged subtypes, respectively (**Figure 5B**, **Figure S5**). In addition, *DUX4*  
280 (*DUX4*-rearranged) and *MEIS1* (*KMT2A*-rearranged) were also identified as up-regulated TF genes  
281 with subtype-enriched TF footprints (**Figure S5**).

282 To determine if these up-regulated TFs promote unique chromatin accessibility landscapes  
283 among B-ALL subtypes, we also performed TF footprinting on subtype-enriched DAS by comparing  
284 differential footprint scores at subtype-enriched DAS between each B-ALL subtype and Pro-B cells  
285 (**Figure 5C**, **Figure S6**). Notably, these data supported a role of *DUX4* in *DUX4*-rearranged ALL,  
286 *ZNF384* and *GATA3* in *ZNF384*-rearranged ALL, and *HOXA9* and *MEIS1* in *KMT2A*-rearranged ALL in  
287 the generation of subtype-specific chromatin landscapes (**Figure 5C**, **Figure S6**).

288

### 289 **Predictive potential of B-ALL subtype-enriched DAS**

290 We determined how well chromatin accessibility can predict B-ALL subtypes by constructing a stepwise  
291 Principal Component Analysis-Linear Discriminant Analysis (PCA-LDA) classification model using the  
292 42,457 subtype-enriched DAS ATAC-seq read count matrix as initial input across 10 B-ALL subtypes  
293 harboring known molecular drivers (outlined in **Figure 6A**). Notably, the constructed classification  
294 model was tested with leave-one-out cross validation at an accuracy of 86%. The most common failure  
295 was incorrect classification of *BCR::ABL1* and Ph-like subtypes (**Figure 6B**), as has been observed  
296 with other ALL classification algorithms<sup>27</sup>. Taking this into account by grouping *BCR::ABL1* and Ph-Like  
297 subtype samples into a common class yielded a re-calculated cross validation accuracy of 91%.  
298 Visualization of B-ALL subtype separations using select dimensions output by the LDA model  
299 demonstrates distinct groupings of related subtypes emphasizing classification model performance  
300 (**Figure 6C**).

301 As a further application of our classification model, we also applied the algorithm to 26 B-ALL  
302 patient samples of unknown molecular B-ALL subtype. Although transcriptomic profiling for B-ALL  
303 drivers is not available to fully validate these samples, when processed with the constructed PCA-LDA  
304 model and projected onto original LDA dimensions they distinctly cluster with known molecular  
305 subtypes supporting reasonable predictions (**Figure 6D**). Collectively, these data support the utility of  
306 chromatin structure and subtype-enriched DAS in B-ALL subtype classification.

307

308

### 309 **Mapping inherited DNA sequence variants that impact chromatin accessibility**

310 To determine how germline variation impacts chromatin accessibility, we identified chromatin  
311 accessibility quantitative trait loci using ATAC-seq (ATAC-QTLs) in a subset of 69 patient samples with  
312 available SNP genotyping information and allele-specific ATAC-seq read counting using RASQUAL<sup>28</sup>.  
313 In total, 9080 ATAC-QTLs were identified representing both directionalities, with reference or alternative  
314 alleles increasing chromatin accessibility (FDR<0.1; **Figure 7A, Table S8**). Manual quantification and  
315 scaling of allele-specific read counts for select ATAC-QTLs identified with RASQUAL demonstrated a  
316 clear concordance and directionality among individual patient samples classified into genotype groups  
317 (**Figure 7B**). Visual inspection of merged read counts from patient samples grouped into reference  
318 allele homozygote, heterozygote, or alternate allele homozygote for select ATAC-QTLs further supports  
319 the high-quality nature of identified ATAC-QTLs (**Figure 7C**). We further determined that 218 ATAC-  
320 QTLs were also lead eQTL SNPs when compared to GTEx eQTLs<sup>29</sup> from relevant tissues (blood and  
321 lymphoblastoid cells), with 85% also concordant for allele overrepresentation directionality (**Figure 7D**;  
322 **Table S9**). ATAC-QTLs were also compared with inherited genome-wide association study (GWAS)  
323 variants for ALL disease susceptibility which identified rs3824662 (*GATA3*)<sup>30</sup> and rs17481869 (2p22.3)  
324<sup>31</sup> as ATAC-QTLs that were associated with risk of developing B-ALL. Further supporting the validity of  
325 our methodology, rs3824662 was also identified as an ATAC-QTL in ALL PDX samples<sup>32</sup>, and we  
326 functionally validated differential allele-specific activity for rs17481869 in multiple B-ALL cell lines  
327 (**Figure S7**).

328 To infer the impact of TF binding in control of chromatin accessibility at ATAC-QTLs we  
329 overlapped ATAC-QTL loci with TF motifs determined as TF-bound by footprint profiling<sup>12</sup>. Nearly one-  
330 third (28.8%; 2615/9080 ATAC-QTLs) of these ATAC-QTLs overlapped a TF-bound motif footprint  
331 across multiple B-ALL subtypes, suggesting that most ATAC-QTLs do not have a clear TF-binding  
332 mechanism in how they impact chromatin accessibility. Analysis of bound TF motif footprint prevalence  
333 at ATAC-QTLs identified several ETS family TFs (EHF, ELF3, SPI1/PU.1 and SPIB), zinc finger TFs  
334 (ZNF263, ZNF460, ZNF740 and ZNF148) and CTCF as the most altered motifs leading to differences  
335 in chromatin accessibility between alleles (**Figure 7E**). Notably, we also identified PAX5 and IKZF1,  
336 which have known roles in B-cell development and leukemogenesis<sup>33-36</sup>. Collectively, these data  
337 identify inherited DNA sequence variants contributing to chromatin heterogeneity among B-ALL  
338 subtypes and indicate specific TFs of interest for further exploration of ATAC-QTLs.

339  
340  
341  
342

## 343 DISCUSSION

344 Our study provides the first, large-scale examination of chromatin accessibility in the B-ALL genome  
345 across an expansive set of B-ALL subtypes. We further integrated this data with ChIP-seq histone  
346 modification enrichment in primary B-ALL cells and three-dimensional chromatin looping data using  
347 promoter capture Hi-C in multiple B-ALL cell lines. Our data demonstrate that most regions of  
348 chromatin accessibility harbor activating chromatin marks consistent with *cis*-regulatory elements  
349 involved in gene regulation, and we further confirmed direct looping to gene promoters for  
350 approximately 50% of accessible chromatin sites. However, this does not rule out more transient  
351 chromatin looping interactions difficult to detect by current chromatin conformation capture genomic  
352 techniques.

353 Extensive epigenomic reprogramming was uncovered between B-cell progenitors and B-ALL,  
354 and cell-of-origin analyses identified Pro-B cells as the most common cell-of-origin. Our comparison of  
355 B-ALL and pro-B cell chromatin accessibility suggests epigenomic reprogramming that is, in part,  
356 associated with AP-1 TF occupancy. We further identify disruptions to normal B-cell function through  
357 the activation of toll-like receptor signaling and interleukin production. Acetyl Co-A synthesis was also  
358 identified as an enriched gene ontology term when comparing B-ALL and Pro-B cells. Metabolic  
359 alterations in cancer are well known, particularly acetyl-Co-A synthesis alterations which have been  
360 previously reported in cancer <sup>37</sup>. In addition to metabolic alterations, *PTEN*, a known tumor suppressor  
361 gene is frequently mutated in a large portion of cancers <sup>38</sup>. However, in B-ALL the cancer role of *PTEN*  
362 has been reported to be inverted, functioning instead as an oncogene <sup>39</sup>. Reinforcing this conclusion  
363 and further suggesting *PTEN* as an intriguing target for B-ALL treatment, we also found *PTEN* in our  
364 network as a top gene target of B-ALL enriched DAS.

365 We further examined accessible chromatin landscapes among diverse molecular subtypes of B-  
366 ALL. Collectively, we identified 42,457 subtype-enriched DAS which strikingly represent 20% of  
367 analyzed accessible chromatin sites across a pan-subtype B-ALL genome. Subtype-enriched DAS  
368 were enriched near up-regulated DEG in the corresponding subtype, supporting their role in gene  
369 activation. Moreover, comparisons between subtype-enriched DAS and chromatin accessibility data  
370 from cell lines identified largely consistent patterns. We further identified candidate TFs that exhibited  
371 strong subtype-specificity through TF footprinting analyses and validated some of these findings using  
372 transcriptomic data from primary B-ALL cells. Collectively, these analyses highlighted the role of  
373 *HOXA9* and *MEIS1* in *KMT2A*-rearranged ALL, *GATA3* in *ZNF384*-rearranged ALL and *RARA* in  
374 *PAX5*-altered B-ALL. We further confirmed the previously reported roles of *DUX4* and *ZNF384* in  
375 *DUX4*-rearranged and *ZNF384*-rearranged ALLs, respectively. Concordant with our findings, previous  
376 studies have identified the co-upregulation of *HOXA9* and *MEIS1* in *KMT2A*-rearranged leukemias and

377 further support that these TFs are key drivers of leukemogenesis<sup>40-42</sup>. Our identification of numerous  
378 HOX TFs with enriched footprints in *KMT2A*-rearranged ALL is also consistent with observations of  
379 HOX gene dysregulation in this subtype<sup>43</sup>. Further supporting our results, ZNF384 fusion proteins in  
380 *ZNF384*-rearranged ALL are known to up-regulate *GATA3* expression<sup>44,45</sup>. Although a direct role for  
381 *RARA* in *PAX5*-altered B-ALL has not been established, previous work has identified *PAX5* as a target  
382 gene of the PLZF-*RARA* fusion protein in acute promyelocytic leukemia<sup>46</sup>. Moreover, both *RARA* and  
383 *PAX5* genes can form fusions with *PML* in acute promyelocytic leukemia<sup>47</sup> and ALL<sup>48</sup>, respectively.  
384 While *PAX5*-altered ALL has not been well connected to *RARA* nuclear receptor signaling, there has  
385 been previous work treating IKZF1 mutated BCR-ABL1 ALL with *RARA* and RXR agonists that  
386 suppressed a self-renewal phenotype<sup>49</sup>. Collectively, these data warrant further investigation of *RARA*  
387 and RXR signaling in *PAX5*-altered ALL.

388 Supporting the utility of chromatin accessibility in B-ALL classification, subtype-enriched DAS  
389 predicted subtypes with 86% accuracy. As a comparison to chromatin accessibility, transcriptional  
390 profiling using ALLSorts correctly assigned B-ALL subtypes with 92% accuracy<sup>27</sup>. However, this RNA-  
391 seq dataset included over 1223 transcriptomes from 18 subtypes representing a considerably larger  
392 dataset for model development. We therefore suspect that additional chromatin accessibility profiling  
393 across more B-ALL subtypes and increased sample sizes will lead to even better subtype prediction  
394 that will rival transcriptomic profiling and importantly, incorporate intergenic heterogeneity that can  
395 elucidate *cis*-regulatory drivers of B-ALL leukemogenesis.

396 To identify the role of inherited DNA sequence variation on the B-ALL chromatin landscape, we  
397 mapped over 9000 ATAC-QTLs (FDR<0.1). A large subset of ATAC-QTLs mapped to TF footprints and  
398 were concordant in allelic biases with GTEx lead eQTLs. Further validating our analysis, we functionally  
399 validated a variant (rs17481869; 2p22.3) associated with susceptibility to ALL<sup>31</sup>. Collectively, this  
400 analysis suggests that chromatin accessibility is additionally modified by inherited DNA sequence  
401 variation, thereby further contributing to increased chromatin heterogeneity in B-ALL.

402 Overall, our data support pronounced changes in chromatin accessibility between B-ALL and  
403 precursor B-cells, as well as among B-ALL subtypes. Our results further support the role of diverse TFs  
404 and inherited genetic variants in modulating and promoting differences in chromatin accessibility among  
405 B-ALL subtypes. Ultimately, these diverse chromatin architectures contribute to unique gene regulatory  
406 networks and transcriptional programs. Our work therefore provides a valuable resource to the cancer  
407 genomics research community and can be further used to better understand biological as well as  
408 clinical differences among B-ALL subtypes.

409  
410

## 411 **METHODS**

### 412 **Patient samples**

413 Patient samples were obtained from: St. Jude Children's Research Hospital (Memphis, Tennessee),  
414 ECOG-ACRIN Cancer Research Group, The Alliance for Clinical Trials in Oncology, MD Anderson  
415 Cancer Center (Houston, Texas), Cook Children's Medical Center (Fort Worth, Texas), Lucile Packard  
416 Children's Hospital (Palo Alto, California), The University of Chicago (Chicago, Illinois), Novant Health  
417 Hemby Children's Hospital (Charlotte, North Carolina) and Children's Hospital of Michigan (Detroit,  
418 Michigan). All patients or their legal guardians provided written informed consent. The use of these  
419 samples was approved by the institutional review board at St. Jude Children's Research Hospital.

420

### 421 **Functional genomic studies**

422 ATAC-seq using the Fast-ATAC<sup>10</sup> protocol was performed on 10,000 fresh primary ALL cells. H3K27ac  
423 ChIP-seq was performed as previously described<sup>50</sup> on 20 million fresh primary ALL cells. CUT&RUN for  
424 FOSL2/Fra2 (Cell signaling; 19967S), JUN (Epicyphe; 13-2019) and JUNB (Cell Signaling; 3753S)  
425 was performed using the Epicyphe Cutana CUT&RUN kit v3.0 (14-1048) according to the  
426 manufacturers provided instructions. Next-generation sequencing of ATAC-seq, CUT&RUN, and ChIP-  
427 seq was performed at the Hartwell Center for Bioinformatics and Biotechnology at St. Jude Children's  
428 Research Hospital. Transcriptomic and SNP genotyping data from B-ALL patient samples were  
429 obtained from St. Jude Children's Research Hospital. Normal B-cell ATAC-seq<sup>10,25</sup> were downloaded  
430 from NCBI (GSE122989 and GSE74912). B-ALL cell histone modification ChIP-seq datasets  
431 (H3K27ac, H3K4me1 and H3K27me3) were downloaded from the Blueprint Epigenome Consortium  
432 (<https://www.blueprint-epigenome.eu/>). Expression quantitative trait loci (eQTL) data was obtained from  
433 previous studies<sup>51</sup>. Arima promoter capture Hi-C (Arima; A510008, A303010, A302010) was performed  
434 on 10 million B-ALL cell lines (697, BALL1, Nalm6, RS411, REH, SEM and SUPB15) according to the  
435 manufacturers provided instructions using unspecified proprietary buffers, solutions, enzymes, and  
436 reagents. See **Supplemental Methods** for additional details.

437

### 438 **Data analysis**

439 ATAC-seq and ChIP-seq reads were mapped to the hg19 reference genome using bowtie2<sup>52</sup> and  
440 peaks were identified using MACS2<sup>53</sup>. Regions of interest for ATAC-seq analyses were selected using  
441 a reproducible peak summit approach within each subtype cohort with subsequent region merging.  
442 DESeq2<sup>54</sup> was employed to identify B-ALL-enriched or subtype-enriched differentially accessible  
443 chromatin sites (DAS). Two B-ALL subtype patient samples (IKZF1 N159Y and iAMP21) were included  
444 in B-ALL versus Pro-B cell analyses but were excluded from additional studies due to limited sample

445 size. Promoter capture Hi-C libraries from B-ALL cell lines were analyzed at 3-kb resolution using the  
446 Arima CHiC pipeline (v1.4, <https://github.com/ArmaGenomics/CHiC>). Genomic regions representing  
447 separate loop ends were compiled to facilitate overlap determinations with B-ALL patient chromatin  
448 accessible regions of interest using “bedtools intersect”. Enhancer and target gene prediction for  
449 network construction was analyzed with the ABC enhancer algorithm  
450 (<https://github.com/broadinstitute/ABC-Enhancer-Gene-Prediction>). In brief, inputs for the ABC  
451 enhancer algorithm included, B-ALL enriched DAS, merged B-ALL patient ATAC-seq, H3K27Ac ChIP-  
452 seq, Arima promoter capture Hi-C contact counts with ABC score threshold at 0.04. The Genomic  
453 Regions Enrichment of Annotations Tool (GREAT)<sup>55</sup> was used to identify candidate target gene sets  
454 and ontologies associated with DAS. TOBIAS<sup>12</sup> was used to identify TF footprints at accessible  
455 chromatin sites. The Principal Component Analysis-Linear Discriminant Analysis (PCA-LDA) subtype  
456 classification model was constructed stepwise by first PCA transformation of subtype-enriched ATAC-  
457 seq counts, then applying LDA on an optimized number of principal components. RASQUAL<sup>28</sup> was  
458 used to map chromatin accessibility quantitative trait loci using ATAC-seq (ATAC-QTLs). Significant  
459 ATAC-QTLs for each region were identified with a genome-wide computed FDR of 10%. See  
460 **Supplemental Methods** for additional details.

461  
462  
463

## 464 **DATA AND CODE AVAILABILITY**

465 Further information and requests for resources should be directed to and will be fulfilled by the lead  
466 contact, Daniel Savic (daniel.savic@stjude.org).

467

## 468 **ACKNOWLEDGEMENTS**

469 We would like to thank the Hartwell Center at St. Jude for ATAC-seq, ChIP-seq and promoter capture  
470 Hi-C library preparation and next-generation sequencing. We would also like to thank Jeremy Hunt and  
471 Brandon Smart for technical support. This work was supported by the National Cancer Institute  
472 (R01CA234490, P30CA021765, UG1CA232760, UG1CA189859, and U10CA180820), the National  
473 Institute of General Medical Studies (P50GM115279) and the American Lebanese Syrian Associated  
474 Charities (ALSAC). The content is solely the responsibility of the authors and does not necessarily  
475 represent the official views of the National Institutes of Health.

476

## 477 **DECLARATIONS OF INTEREST**

478 The authors declare no competing interests.

479

## 480 **AUTHOR CONTRIBUTIONS**

481 Conceptualization, K.R. Barnett, D.S.; Methodology, K.R. Barnett, D.S.; Investigation, K.R. Barnett,  
482 J.D.D., B.P.B, K.R. Bhattarai; Analysis, K.R. Barnett, D.S.; Data Curation, K.R.B., W.Y.; Patient sample  
483 acquisition, K.R.C., C.S.M., E.J., E.P., M.R.L., S.M.K., W.S., H.I., S.J., C.H.P., C.G.M., M.V.R., W.E.E.,  
484 J.J.Y.; Writing – Original Draft, K.R. Barnett, D.S.; Writing – Review & Editing, K.R. Barnett, J.D.D.,  
485 B.P.B, K.R. Bhattarai, W.Y., K.R.C., C.S.M., E.J., E.P., M.R.L., S.M.K., W.S., H.I., S.J., C.H.P., C.G.M.,  
486 M.V.R., W.E.E., J.J.Y, D.S.

487

## 488 **REFERENCES**

- 489 1. Moriyama, T., Relling, M.V., and Yang, J.J. (2015). Inherited genetic variation in childhood acute  
490 lymphoblastic leukemia. *Blood* 125, 3988-3995. 10.1182/blood-2014-12-580001.
- 491 2. Mullighan, C.G. (2012). Molecular genetics of B-precursor acute lymphoblastic leukemia. *J Clin*  
492 *Invest* 122, 3407-3415. 10.1172/JCI61203.
- 493 3. Lilljebjorn, H., Henningsson, R., Hyrenius-Wittsten, A., Olsson, L., Orsmark-Pietras, C., von  
494 Palfy, S., Askmyr, M., Rissler, M., Schrappe, M., Cario, G., et al. (2016). Identification of ETV6-  
495 RUNX1-like and DUX4-rearranged subtypes in paediatric B-cell precursor acute lymphoblastic  
496 leukaemia. *Nat Commun* 7, 11790. 10.1038/ncomms11790.
- 497 4. Andersson, A., Olofsson, T., Lindgren, D., Nilsson, B., Ritz, C., Eden, P., Lassen, C., Rade, J.,  
498 Fontes, M., Morse, H., et al. (2005). Molecular signatures in childhood acute leukemia and their  
499 correlations to expression patterns in normal hematopoietic subpopulations. *Proc Natl Acad Sci*  
500 *U S A* 102, 19069-19074. 10.1073/pnas.0506637102.
- 501 5. Figueroa, M.E., Chen, S.C., Andersson, A.K., Phillips, L.A., Li, Y., Sotzen, J., Kundu, M.,  
502 Downing, J.R., Melnick, A., and Mullighan, C.G. (2013). Integrated genetic and epigenetic  
503 analysis of childhood acute lymphoblastic leukemia. *J Clin Invest* 123, 3099-3111.  
504 10.1172/JCI66203.
- 505 6. Almamun, M., Levinson, B.T., van Swaay, A.C., Johnson, N.T., McKay, S.D., Arthur, G.L.,  
506 Davis, J.W., and Taylor, K.H. (2015). Integrated methylome and transcriptome analysis reveals  
507 novel regulatory elements in pediatric acute lymphoblastic leukemia. *Epigenetics* 10, 882-890.  
508 10.1080/15592294.2015.1078050.
- 509 7. Klemm, S.L., Shipony, Z., and Greenleaf, W.J. (2019). Chromatin accessibility and the  
510 regulatory epigenome. *Nat Rev Genet* 20, 207-220. 10.1038/s41576-018-0089-8.
- 511 8. Bhagwat, A.S., Lu, B., and Vakoc, C.R. (2018). Enhancer dysfunction in leukemia. *Blood* 131,  
512 1795-1804. 10.1182/blood-2017-11-737379.
- 513 9. Buenrostro, J.D., Giresi, P.G., Zaba, L.C., Chang, H.Y., and Greenleaf, W.J. (2013).  
514 Transposition of native chromatin for fast and sensitive epigenomic profiling of open chromatin,  
515 DNA-binding proteins and nucleosome position. *Nat Methods* 10, 1213-1218.  
516 10.1038/nmeth.2688.
- 517 10. Corces, M.R., Buenrostro, J.D., Wu, B., Greenside, P.G., Chan, S.M., Koenig, J.L., Snyder,  
518 M.P., Pritchard, J.K., Kundaje, A., Greenleaf, W.J., et al. (2016). Lineage-specific and single-cell  
519 chromatin accessibility charts human hematopoiesis and leukemia evolution. *Nat Genet* 48,  
520 1193-1203. 10.1038/ng.3646.

- 521 11. Boyle, A.P., Davis, S., Shulha, H.P., Meltzer, P., Margulies, E.H., Weng, Z., Furey, T.S., and  
522 Crawford, G.E. (2008). High-resolution mapping and characterization of open chromatin across  
523 the genome. *Cell* 132, 311-322. 10.1016/j.cell.2007.12.014.
- 524 12. Bentsen, M., Goymann, P., Schultheis, H., Klee, K., Petrova, A., Wiegandt, R., Fust, A.,  
525 Preussner, J., Kuenne, C., Braun, T., et al. (2020). ATAC-seq footprinting unravels kinetics of  
526 transcription factor binding during zygotic genome activation. *Nat Commun* 11, 4267.  
527 10.1038/s41467-020-18035-1.
- 528 13. Gusmao, E.G., Allhoff, M., Zenke, M., and Costa, I.G. (2016). Analysis of computational  
529 footprinting methods for DNase sequencing experiments. *Nat Methods* 13, 303-309.  
530 10.1038/nmeth.3772.
- 531 14. Zhang, K., Hocker, J.D., Miller, M., Hou, X., Chiou, J., Poirion, O.B., Qiu, Y., Li, Y.E., Gaulton,  
532 K.J., Wang, A., et al. (2021). A single-cell atlas of chromatin accessibility in the human genome.  
533 *Cell* 184, 5985-6001 e5919. 10.1016/j.cell.2021.10.024.
- 534 15. Corces, M.R., Granja, J.M., Shams, S., Louie, B.H., Seoane, J.A., Zhou, W., Silva, T.C.,  
535 Groeneveld, C., Wong, C.K., Cho, S.W., et al. (2018). The chromatin accessibility landscape of  
536 primary human cancers. *Science* 362. 10.1126/science.aav1898.
- 537 16. Cejas, P., Xie, Y., Font-Tello, A., Lim, K., Syamala, S., Qiu, X., Tewari, A.K., Shah, N., Nguyen,  
538 H.M., Patel, R.A., et al. (2021). Subtype heterogeneity and epigenetic convergence in  
539 neuroendocrine prostate cancer. *Nat Commun* 12, 5775. 10.1038/s41467-021-26042-z.
- 540 17. Roadmap Epigenomics, C., Kundaje, A., Meuleman, W., Ernst, J., Bilenky, M., Yen, A., Heravi-  
541 Moussavi, A., Kheradpour, P., Zhang, Z., Wang, J., et al. (2015). Integrative analysis of 111  
542 reference human epigenomes. *Nature* 518, 317-330. 10.1038/nature14248.
- 543 18. Creyghton, M.P., Cheng, A.W., Welstead, G.G., Kooistra, T., Carey, B.W., Steine, E.J., Hanna,  
544 J., Lodato, M.A., Frampton, G.M., Sharp, P.A., et al. (2010). Histone H3K27ac separates active  
545 from poised enhancers and predicts developmental state. *Proc Natl Acad Sci U S A* 107, 21931-  
546 21936. 10.1073/pnas.1016071107.
- 547 19. Heintzman, N.D., Stuart, R.K., Hon, G., Fu, Y., Ching, C.W., Hawkins, R.D., Barrera, L.O., Van  
548 Calcar, S., Qu, C., Ching, K.A., et al. (2007). Distinct and predictive chromatin signatures of  
549 transcriptional promoters and enhancers in the human genome. *Nat Genet* 39, 311-318.  
550 10.1038/ng1966.
- 551 20. Hoffman, B.G., Robertson, G., Zavaglia, B., Beach, M., Cullum, R., Lee, S., Soukhatcheva, G.,  
552 Li, L., Wederell, E.D., Thiessen, N., et al. (2010). Locus co-occupancy, nucleosome positioning,  
553 and H3K4me1 regulate the functionality of FOXA2-, HNF4A-, and PDX1-bound loci in islets and  
554 liver. *Genome Res* 20, 1037-1051. 10.1101/gr.104356.109.
- 555 21. Mifsud, B., Tavares-Cadete, F., Young, A.N., Sugar, R., Schoenfelder, S., Ferreira, L., Wingett,  
556 S.W., Andrews, S., Grey, W., Ewels, P.A., et al. (2015). Mapping long-range promoter contacts  
557 in human cells with high-resolution capture Hi-C. *Nat Genet* 47, 598-606. 10.1038/ng.3286.
- 558 22. Sondka, Z., Bamford, S., Cole, C.G., Ward, S.A., Dunham, I., and Forbes, S.A. (2018). The  
559 COSMIC Cancer Gene Census: describing genetic dysfunction across all human cancers. *Nat*  
560 *Rev Cancer* 18, 696-705. 10.1038/s41568-018-0060-1.
- 561 23. Consortium, I.T.P.-C.A.o.W.G. (2020). Pan-cancer analysis of whole genomes. *Nature* 578, 82-  
562 93. 10.1038/s41586-020-1969-6.
- 563 24. Jackson, T.R., Ling, R.E., and Roy, A. (2021). The Origin of B-cells: Human Fetal B Cell  
564 Development and Implications for the Pathogenesis of Childhood Acute Lymphoblastic  
565 Leukemia. *Front Immunol* 12, 637975. 10.3389/fimmu.2021.637975.
- 566 25. O'Byrne, S., Elliott, N., Rice, S., Buck, G., Fordham, N., Garnett, C., Godfrey, L., Crump, N.T.,  
567 Wright, G., Inglott, S., et al. (2019). Discovery of a CD10-negative B-progenitor in human fetal  
568 life identifies unique ontogeny-related developmental programs. *Blood* 134, 1059-1071.  
569 10.1182/blood.2019001289.
- 570 26. Fulco, C.P., Nasser, J., Jones, T.R., Munson, G., Bergman, D.T., Subramanian, V., Grossman,  
571 S.R., Anyoha, R., Doughty, B.R., Patwardhan, T.A., et al. (2019). Activity-by-contact model of



- 572 enhancer-promoter regulation from thousands of CRISPR perturbations. *Nat Genet* 51, 1664-  
573 1669. 10.1038/s41588-019-0538-0.
- 574 27. Schmidt, B., Brown, L.M., Ryland, G.L., Lonsdale, A., Kosasih, H.J., Ludlow, L.E., Majewski,  
575 I.J., Blombery, P., Ekert, P.G., Davidson, N.M., and Oshlack, A. (2022). ALLSorts: an RNA-Seq  
576 subtype classifier for B-cell acute lymphoblastic leukemia. *Blood Adv* 6, 4093-4097.  
577 10.1182/bloodadvances.2021005894.
- 578 28. Kumasaka, N., Knights, A.J., and Gaffney, D.J. (2016). Fine-mapping cellular QTLs with  
579 RASQUAL and ATAC-seq. *Nat Genet* 48, 206-213. 10.1038/ng.3467.
- 580 29. Consortium, G.T., Laboratory, D.A., Coordinating Center -Analysis Working, G., Statistical  
581 Methods groups-Analysis Working, G., Enhancing, G.g., Fund, N.I.H.C., Nih/Nci, Nih/Nhgri,  
582 Nih/Nimh, Nih/Nida, et al. (2017). Genetic effects on gene expression across human tissues.  
583 *Nature* 550, 204-213. 10.1038/nature24277.
- 584 30. Perez-Andreu, V., Roberts, K.G., Harvey, R.C., Yang, W., Cheng, C., Pei, D., Xu, H., Gastier-  
585 Foster, J., E, S., Lim, J.Y., et al. (2013). Inherited GATA3 variants are associated with Ph-like  
586 childhood acute lymphoblastic leukemia and risk of relapse. *Nat Genet* 45, 1494-1498.  
587 10.1038/ng.2803.
- 588 31. Vijayakrishnan, J., Studd, J., Broderick, P., Kinnersley, B., Holroyd, A., Law, P.J., Kumar, R.,  
589 Allan, J.M., Harrison, C.J., Moorman, A.V., et al. (2018). Genome-wide association study  
590 identifies susceptibility loci for B-cell childhood acute lymphoblastic leukemia. *Nat Commun* 9,  
591 1340. 10.1038/s41467-018-03178-z.
- 592 32. Yang, H., Zhang, H., Luan, Y., Liu, T., Yang, W., Roberts, K.G., Qian, M.X., Zhang, B., Yang,  
593 W., Perez-Andreu, V., et al. (2022). Noncoding genetic variation in GATA3 increases acute  
594 lymphoblastic leukemia risk through local and global changes in chromatin conformation. *Nat*  
595 *Genet* 54, 170-179. 10.1038/s41588-021-00993-x.
- 596 33. Medvedovic, J., Ebert, A., Tagoh, H., and Busslinger, M. (2011). Pax5: a master regulator of B  
597 cell development and leukemogenesis. *Adv Immunol* 111, 179-206. 10.1016/B978-0-12-  
598 385991-4.00005-2.
- 599 34. Gu, Z., Churchman, M.L., Roberts, K.G., Moore, I., Zhou, X., Nakitandwe, J., Hagiwara, K.,  
600 Pelletier, S., Gingras, S., Berns, H., et al. (2019). PAX5-driven subtypes of B-progenitor acute  
601 lymphoblastic leukemia. *Nat Genet* 51, 296-307. 10.1038/s41588-018-0315-5.
- 602 35. Mullighan, C.G., Su, X., Zhang, J., Radtke, I., Phillips, L.A., Miller, C.B., Ma, J., Liu, W., Cheng,  
603 C., Schulman, B.A., et al. (2009). Deletion of IKZF1 and prognosis in acute lymphoblastic  
604 leukemia. *N Engl J Med* 360, 470-480. 10.1056/NEJMoa0808253.
- 605 36. Churchman, M.L., Qian, M., Te Kronnie, G., Zhang, R., Yang, W., Zhang, H., Lana, T., Tedrick,  
606 P., Baskin, R., Verbist, K., et al. (2018). Germline Genetic IKZF1 Variation and Predisposition to  
607 Childhood Acute Lymphoblastic Leukemia. *Cancer Cell* 33, 937-948 e938.  
608 10.1016/j.ccell.2018.03.021.
- 609 37. Guertin, D.A., and Wellen, K.E. (2023). Acetyl-CoA metabolism in cancer. *Nat Rev Cancer*.  
610 10.1038/s41568-022-00543-5.
- 611 38. Futreal, P.A., Coin, L., Marshall, M., Down, T., Hubbard, T., Wooster, R., Rahman, N., and  
612 Stratton, M.R. (2004). A census of human cancer genes. *Nat Rev Cancer* 4, 177-183.  
613 10.1038/nrc1299.
- 614 39. Shojaee, S., Chan, L.N., Buchner, M., Cazzaniga, V., Cosgun, K.N., Geng, H., Qiu, Y.H., von  
615 Minden, M.D., Ernst, T., Hochhaus, A., et al. (2016). PTEN opposes negative selection and  
616 enables oncogenic transformation of pre-B cells. *Nat Med* 22, 379-387. 10.1038/nm.4062.
- 617 40. Collins, C., Wang, J., Miao, H., Bronstein, J., Nawer, H., Xu, T., Figueroa, M., Muntean, A.G.,  
618 and Hess, J.L. (2014). C/EBPalpha is an essential collaborator in Hoxa9/Meis1-mediated  
619 leukemogenesis. *Proc Natl Acad Sci U S A* 111, 9899-9904. 10.1073/pnas.1402238111.
- 620 41. Sun, Y., Zhou, B., Mao, F., Xu, J., Miao, H., Zou, Z., Phuc Khoa, L.T., Jang, Y., Cai, S., Witkin,  
621 M., et al. (2018). HOXA9 Reprograms the Enhancer Landscape to Promote Leukemogenesis.  
622 *Cancer Cell* 34, 643-658 e645. 10.1016/j.ccell.2018.08.018.

- 623 42. Miyamoto, R., Kanai, A., Okuda, H., Komata, Y., Takahashi, S., Matsui, H., Inaba, T., and  
624 Yokoyama, A. (2021). HOXA9 promotes MYC-mediated leukemogenesis by maintaining gene  
625 expression for multiple anti-apoptotic pathways. *Elife* *10*. 10.7554/eLife.64148.
- 626 43. Ferrando, A.A., Armstrong, S.A., Neuberg, D.S., Sallan, S.E., Silverman, L.B., Korsmeyer, S.J.,  
627 and Look, A.T. (2003). Gene expression signatures in MLL-rearranged T-lineage and B-  
628 precursor acute leukemias: dominance of HOX dysregulation. *Blood* *102*, 262-268.  
629 10.1182/blood-2002-10-3221.
- 630 44. Qian, M., Zhang, H., Kham, S.K., Liu, S., Jiang, C., Zhao, X., Lu, Y., Goodings, C., Lin, T.N.,  
631 Zhang, R., et al. (2017). Whole-transcriptome sequencing identifies a distinct subtype of acute  
632 lymphoblastic leukemia with predominant genomic abnormalities of EP300 and CREBBP.  
633 *Genome Res* *27*, 185-195. 10.1101/gr.209163.116.
- 634 45. Yaguchi, A., Ishibashi, T., Terada, K., Ueno-Yokohata, H., Saito, Y., Fujimura, J., Shimizu, T.,  
635 Ohki, K., Manabe, A., and Kiyokawa, N. (2017). EP300-ZNF384 fusion gene product up-  
636 regulates GATA3 gene expression and induces hematopoietic stem cell gene expression  
637 signature in B-cell precursor acute lymphoblastic leukemia cells. *Int J Hematol* *106*, 269-281.  
638 10.1007/s12185-017-2220-6.
- 639 46. Spicuglia, S., Vincent-Fabert, C., Benoukraf, T., Tiberi, G., Saurin, A.J., Zacarias-Cabeza, J.,  
640 Grimwade, D., Mills, K., Calmels, B., Bertucci, F., et al. (2011). Characterisation of genome-  
641 wide PLZF/RARA target genes. *PLoS One* *6*, e24176. 10.1371/journal.pone.0024176.
- 642 47. Chen, Z., and Chen, S.J. (1992). RARA and PML genes in acute promyelocytic leukemia. *Leuk*  
643 *Lymphoma* *8*, 253-260. 10.3109/10428199209051004.
- 644 48. Kurahashi, S., Hayakawa, F., Miyata, Y., Yasuda, T., Minami, Y., Tsuzuki, S., Abe, A., and  
645 Naoe, T. (2011). PAX5-PML acts as a dual dominant-negative form of both PAX5 and PML.  
646 *Oncogene* *30*, 1822-1830. 10.1038/onc.2010.554.
- 647 49. Churchman, M.L., Low, J., Qu, C., Paietta, E.M., Kasper, L.H., Chang, Y., Payne-Turner, D.,  
648 Althoff, M.J., Song, G., Chen, S.C., et al. (2015). Efficacy of Retinoids in IKZF1-Mutated BCR-  
649 ABL1 Acute Lymphoblastic Leukemia. *Cancer Cell* *28*, 343-356. 10.1016/j.ccell.2015.07.016.
- 650 50. Ferguson, D.C., McCorkle, J.R., Barnett, K.R., Bonten, E.J., Bergeron, B.P., Bhattarai, K.R.,  
651 Yang, W., Smith, C., Hansen, B.S., Bajpai, R., et al. (2022). Amino acid stress response genes  
652 promote L-asparaginase resistance in pediatric acute lymphoblastic leukemia. *Blood Adv* *6*,  
653 3386-3397. 10.1182/bloodadvances.2022006965.
- 654 51. Autry, R.J., Paugh, S.W., Carter, R., Shi, L., Liu, J., Ferguson, D.C., Lau, C.E., Bonten, E.J.,  
655 Yang, W., McCorkle, J.R., et al. (2020). Integrative genomic analyses reveal mechanisms of  
656 glucocorticoid resistance in acute lymphoblastic leukemia. *Nat Cancer* *1*, 329-344.  
657 10.1038/s43018-020-0037-3.
- 658 52. Langmead, B., and Salzberg, S.L. (2012). Fast gapped-read alignment with Bowtie 2. *Nat*  
659 *Methods* *9*, 357-359. 10.1038/nmeth.1923.
- 660 53. Zhang, Y., Liu, T., Meyer, C.A., Eeckhoute, J., Johnson, D.S., Bernstein, B.E., Nusbaum, C.,  
661 Myers, R.M., Brown, M., Li, W., and Liu, X.S. (2008). Model-based analysis of ChIP-Seq  
662 (MACS). *Genome Biol* *9*, R137. 10.1186/gb-2008-9-9-r137.
- 663 54. Love, M.I., Huber, W., and Anders, S. (2014). Moderated estimation of fold change and  
664 dispersion for RNA-seq data with DESeq2. *Genome Biol* *15*, 550. 10.1186/s13059-014-0550-8.
- 665 55. McLean, C.Y., Bristor, D., Hiller, M., Clarke, S.L., Schaar, B.T., Lowe, C.B., Wenger, A.M., and  
666 Bejerano, G. (2010). GREAT improves functional interpretation of cis-regulatory regions. *Nat*  
667 *Biotechnol* *28*, 495-501. 10.1038/nbt.1630.

669

670

## 671 **FIGURE LEGENDS**

672

673 **FIGURE 1: Chromatin accessibility landscapes in B-ALL. (A)** Number and genomic location of  
674 accessible chromatin sites for 10 B-ALL subtypes and B-other samples is provided. **(B)** Percentage of  
675 B-ALL accessible chromatin sites that maps to H3K4me1 and/or H3K27ac active histone marks (Active;  
676 green), H3K27me3 and H3K4me1 and/or H3K27ac bivalent or poised histone marks (Bivalent or  
677 Poised; yellow) and H3K27me3 only repressed histone marks (Repressed; red). **(C)** B-ALL cell line  
678 chromatin loops detected using promoter capture Hi-C at B-ALL accessible chromatin sites. The total  
679 number of B-ALL accessible chromatin sites, number of B-ALL accessible chromatin sites within loops  
680 and the total number of accessible chromatin sites with a loop to a gene implicated in cancer is shown.  
681 **(D)** UCSC genome browser ATAC-seq signal track of average B-ALL chromatin accessibility and  
682 promoter capture Hi-C loops across the *IKZF1* gene locus. **(E)** UCSC genome browser ATAC-seq  
683 signal tracks of 10 merged B-ALL subtypes with known molecular drivers across the *IKZF1* gene locus.  
684

685 **FIGURE 2: B-ALL cell type-of-origin defined by chromatin accessibility. (A)** Differentiation timeline  
686 of B-cell progenitors from least differentiated to most differentiated. HSC= hematopoietic stem cell,  
687 MPP= multipotent progenitor cell, LMPP= lymphoid-primed multipotent progenitor cell, CLP= common  
688 lymphoid progenitor cell, PreProB= prePro-B cell, ProB= Pro-B cell and CD19+,CD20+= B cell. **(B)**  
689 Heatmap of B-cell progenitor or B-ALL patient sample variance stabilized ATAC-seq signal across B-  
690 cell progenitor-defining chromatin loci. B-cell progenitor groups most similar to B-ALL patient samples  
691 (preProB and ProB) are outlined in yellow. **(C)** Confusion matrix showing number (listed) and  
692 percentage (color-coded) of B-cell progenitor truths and predictions for leave-one-out cross validation of  
693 a K-nearest neighbor classifier model. **(D)** Distribution of B-cell progenitor classification across B-ALL  
694 patient samples using a K-nearest neighbor classifier model trained with B-cell progenitor data.  
695

696 **FIGURE 3: Mapping differential accessibility between B-ALL and Pro-B cells. (A)** Heatmap of Pro-  
697 B cell or B-ALL patient sample variance stabilized ATAC-seq signal as z-score across Pro-B cell and B-  
698 ALL enriched DAS. DAS within heatmap are  $> 1$  or  $< -1$   $\log_2$ -adjusted fold change. **(B)** ATAC-seq signal  
699 track examples of Pro-B-cell-enriched DAS and B-ALL-enriched DAS on the UCSC genome browser.  
700 Flanking genomic regions are included for context. **(C)** Gene ontology analysis of DAS with higher  
701 accessibility in B-ALL (B-ALL-enriched) at various  $\log_2$ -adjusted fold change thresholds. All terms were  
702 significant using both binomial and hypergeometric statistical tests. **(D)** Differential transcription factor  
703 footprinting between Pro-B cells and B-ALL patient samples across 217,240 B-ALL genomic regions of  
704 interest. **(E)** FOSL2 CUT&RUN enrichment heatmaps at all B-ALL accessible chromatin sites and B-

705 ALL enriched DAS (B-ALL enrich) in SUPB15 (left) and 697 (right) cells. **(F)** Number of B-ALL enriched  
706 DAS overlapping AP-1 TF occupancy (FOSL2, JUN and/or JUNB) in 697 (left) SUPB15 (middle) and  
707 both B-ALL cell lines (right). Number of overlapping sites are shown in purple while non-overlapping  
708 sites are shown in yellow. **(G)** Genome annotation of B-ALL enriched DAS with AP-1 TF occupancy  
709 (left) or that are devoid of AP-1 TF occupancy (right). **(H)** IGV genome browser image showing a B-ALL  
710 enriched DAS that maps to accessible chromatin and sites of AP-1 TF occupancy in SUPB15 cells.  
711 Promoter capture Hi-C (PC-HiC) looping between the distal AP-1 occupied sites and the *IGFBP7* gene  
712 promoter is shown. B-ALL (red) and pro-B (blue) cell ATAC-seq tracks are overlaid in the top panel.  
713 Signal tracks for FOSL2, JUN and JUNB in SUPB15 cells are shown. **(I)** Transcription factor and target  
714 gene network of DAS with higher accessibility in B-ALL (B-ALL-enriched). Network is subset for top  
715 transcription factor footprints across DAS ranked by the top mean  $\log_2$ -adjusted fold change  
716 transcription factor footprint signal. Target genes are subset for a cancer implicated gene set ranked by  
717 the top expressed genes. Network connections are colored as transcription factors (purple blocks) to  
718 target gene (green arrow heads) pairs. Select expansive and highly similar transcription factor motif  
719 families are grouped (AP-1 and CEBP; AP1-family and CEBP-family).

720

721 **FIGURE 4: Mapping differential accessibility among B-ALL molecular subtypes. (A)** Heatmap of  
722 variance stabilized ATAC-seq signal as z-score across subtype-enriched DAS. Enrichment patterns for  
723 each subtype DAS set are shown on vertical axis and are grouped by B-ALL subtype patient sample on  
724 the horizontal axis. Ph-like and BCR-ABL subtype-enriched DAS are expanded at the right for clarity.  
725 **(B)** Pie chart shows the number and percentage of subtype-enriched DAS identified. **(C)** ATAC-seq  
726 signal track examples of subtype-enriched DAS on the UCSC genome browser. **(D)** Genomic  
727 annotations of subtype-enriched DAS for each B-ALL subtype is provided. The fraction of sites  
728 harboring different annotations is plotted. **(E)** Cumulative distribution function for *BCR::ABL1* and  
729 *ZNF384*-rearranged ALL comparing the fraction (y-axis) of subtype up-regulated genes (Subtype  
730 DEGs; gray or light green) and all expressed subtype genes (Expressed; black) at different distance  
731 cutoffs from subtype-enriched DAS and their transcription start sites (x-axis). Kolmogorov-Smirnov (K-  
732 S) p-values are provided.

733

734 **FIGURE 5: TF footprinting and gene regulatory networks identify key TF drivers in B-ALL**  
735 **subtypes. (A)** Heatmap list of the topmost consistently differential TF footprints between all pairwise  
736 subtype-subtype comparisons (y-axis; labeled to the right of the heatmap as TF motif identifiers)  
737 enriched in 10 B-ALL subtypes (x-axis; labeled on top of heatmap as z-score of differential TF footprint  
738 signal output by TOBIAS). **(B)** RNA-seq transcripts per million (TPM) expression of key TFs with

739 subtype-enriched footprints that are also up-regulated in the corresponding subtype (colored) versus all  
740 other subtypes (gray). DESeq2 differentially expressed gene FDR significance values are provided. **(C)**  
741 Top TF footprints at *KMT2A*-enriched DAS are shown. Differential footprint score between B-ALL and  
742 Pro-B cells is provided on the x-axis and TF footprint significance is provided on the y-axis. Transcripts  
743 per million (TPM) transcript abundance of associated TF transcript is shown as both color and size of  
744 points.

745

746 **FIGURE 6: Classification model accurately predicts B-ALL subtypes. (A)** Flow chart outlines  
747 process for PCA-LDA classification of B-ALL subtypes. **(B)** Confusion matrix showing number (listed)  
748 and percentage (color-coded) of B-ALL subtype truths and predictions for leave-one-out cross  
749 validation. **(C)** Three-dimensional plots showing clustering of B-ALL subtypes utilizing select  
750 dimensions from the LDA model. **(D)** B-ALL subtype identification for unknown B-ALL samples (black  
751 points). Clustering for unknown samples identified as *DUX4*-rearranged, *BCR::ABL1* and high  
752 hyperdiploid (from left to right) is shown.

753

754 **FIGURE 7: Identification of ATAC-QTLs impacting chromatin accessibility. (A)** ATAC-QTL effect  
755 size (x-axis) and significance (y-axis) is plotted for all significant ATAC-QTLs (FDR<0.1). **(B)** Examples  
756 of allele-specific effects on ATAC-seq read count at ATAC-QTLs between samples from the three  
757 genotype groups. Homozygous reference allele= homozygous REF, heterozygous= heterozygous REF/ALT and  
758 homozygous alternative allele= homozygous ALT. **(C)** UCSC browser ATAC-seq signal tracks of merged  
759 BAM files from patients with distinct genotypes at *ARL11* (top panel) and *TTC7B* (bottom panel) gene  
760 loci. ATAC-QTLs are marked by an asterisk. Homozygous reference allele= homozygous REF,  
761 heterozygous= heterozygous REF/ALT and homozygous alternative allele= homozygous ALT. ENCODE ChIP-seq  
762 TF binding sites are shown below each ATAC-seq signal track. **(D)** Scatterplot of effect size for SNPs  
763 significant as both ATAC-QTLs (x-axis) and GTEx lead eQTL (y-axis). **(E)** Abundance of top TF-bound  
764 motifs overlapping ATAC-QTLs. Highly similar TF motifs were grouped into motif families via TOBIAS  
765 motif clustering as shown on the x-axis.

**A**

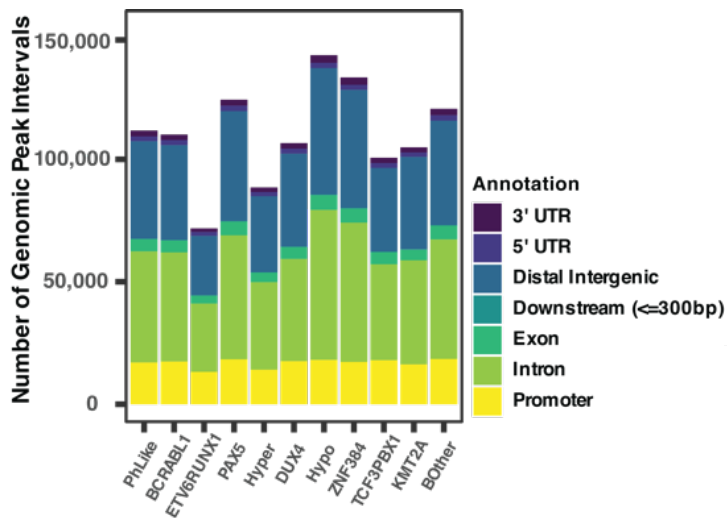

**B**

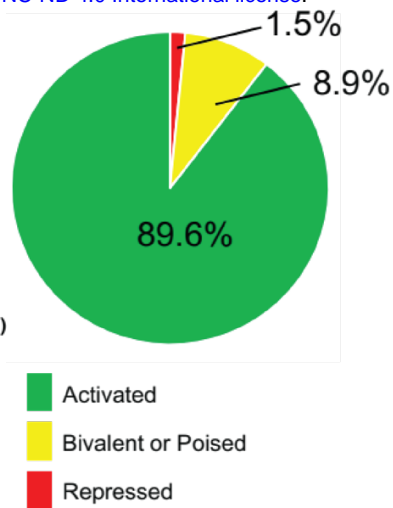

**C**

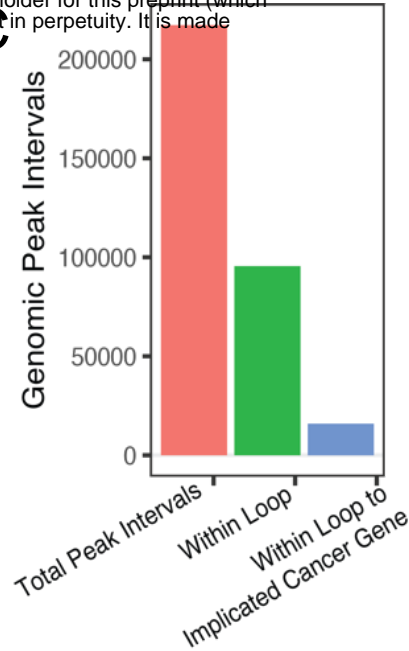

**D**

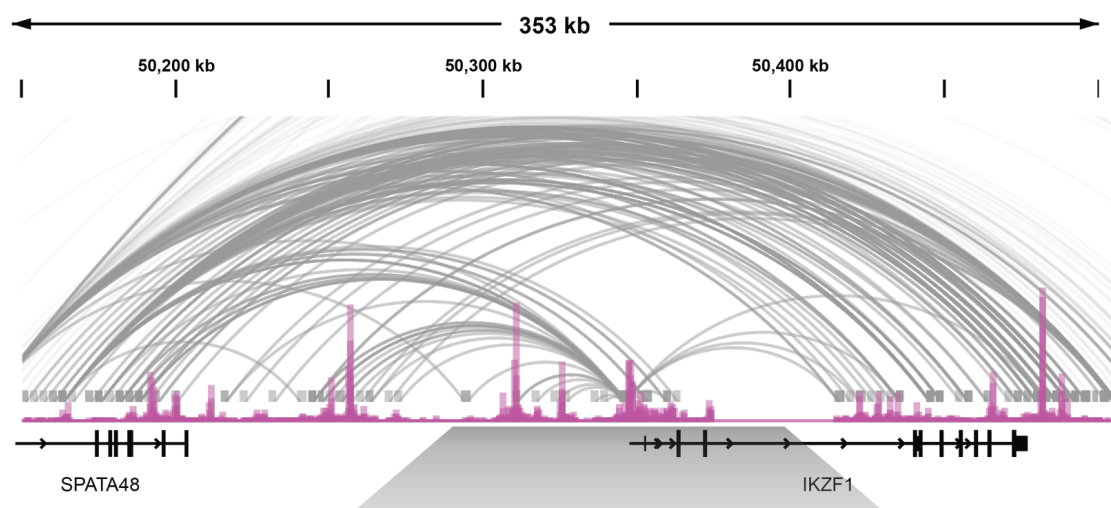

**E**

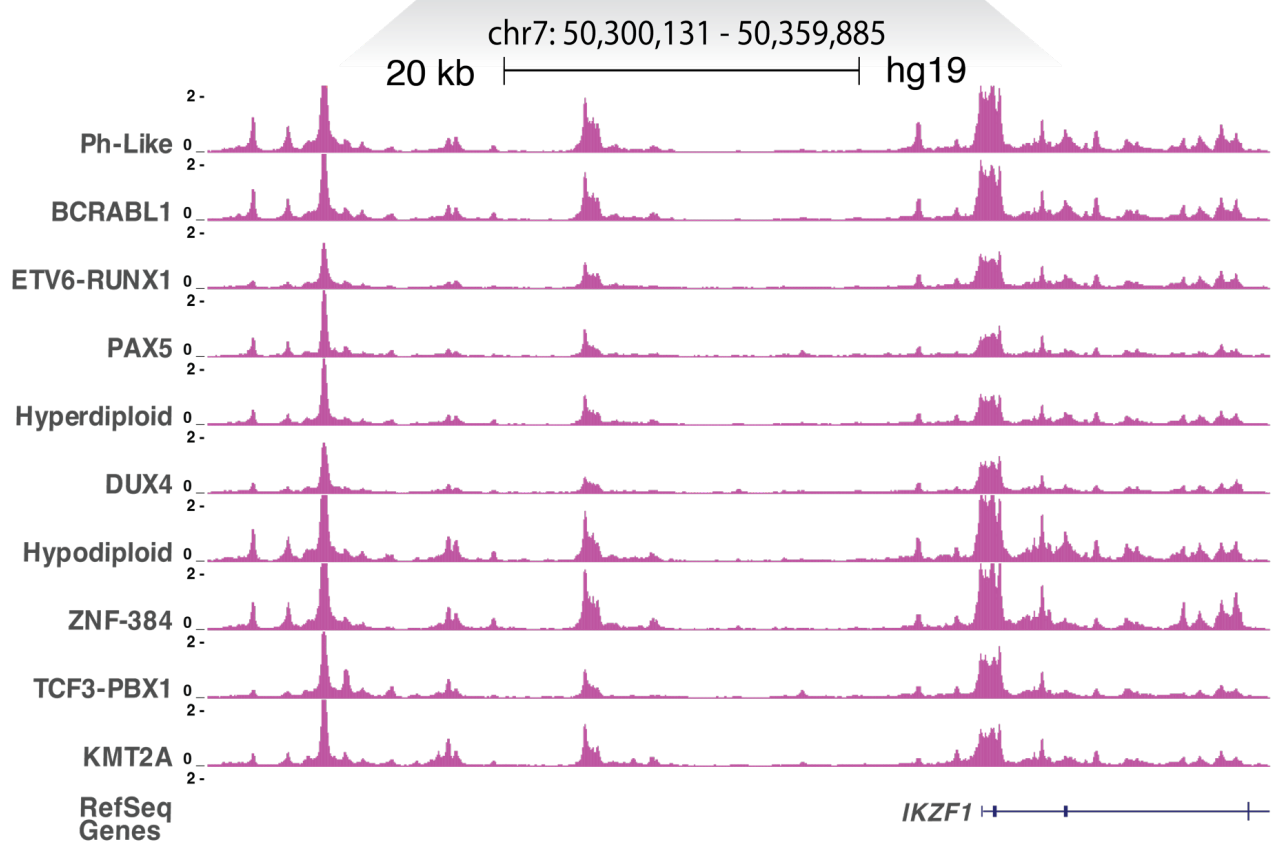

**Figure 1**

**A**

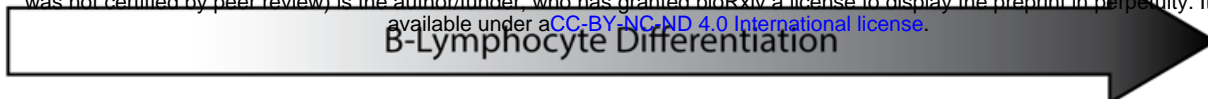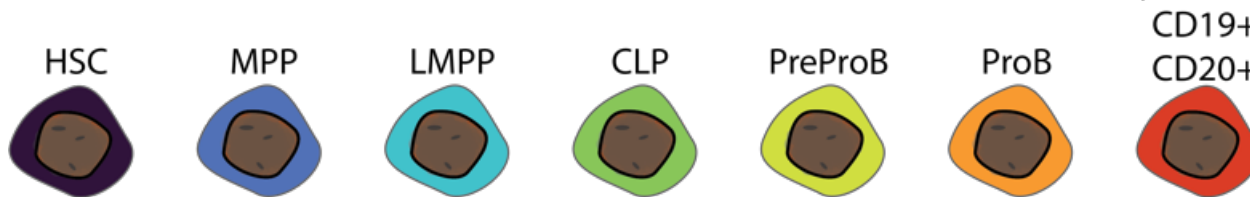

**B**

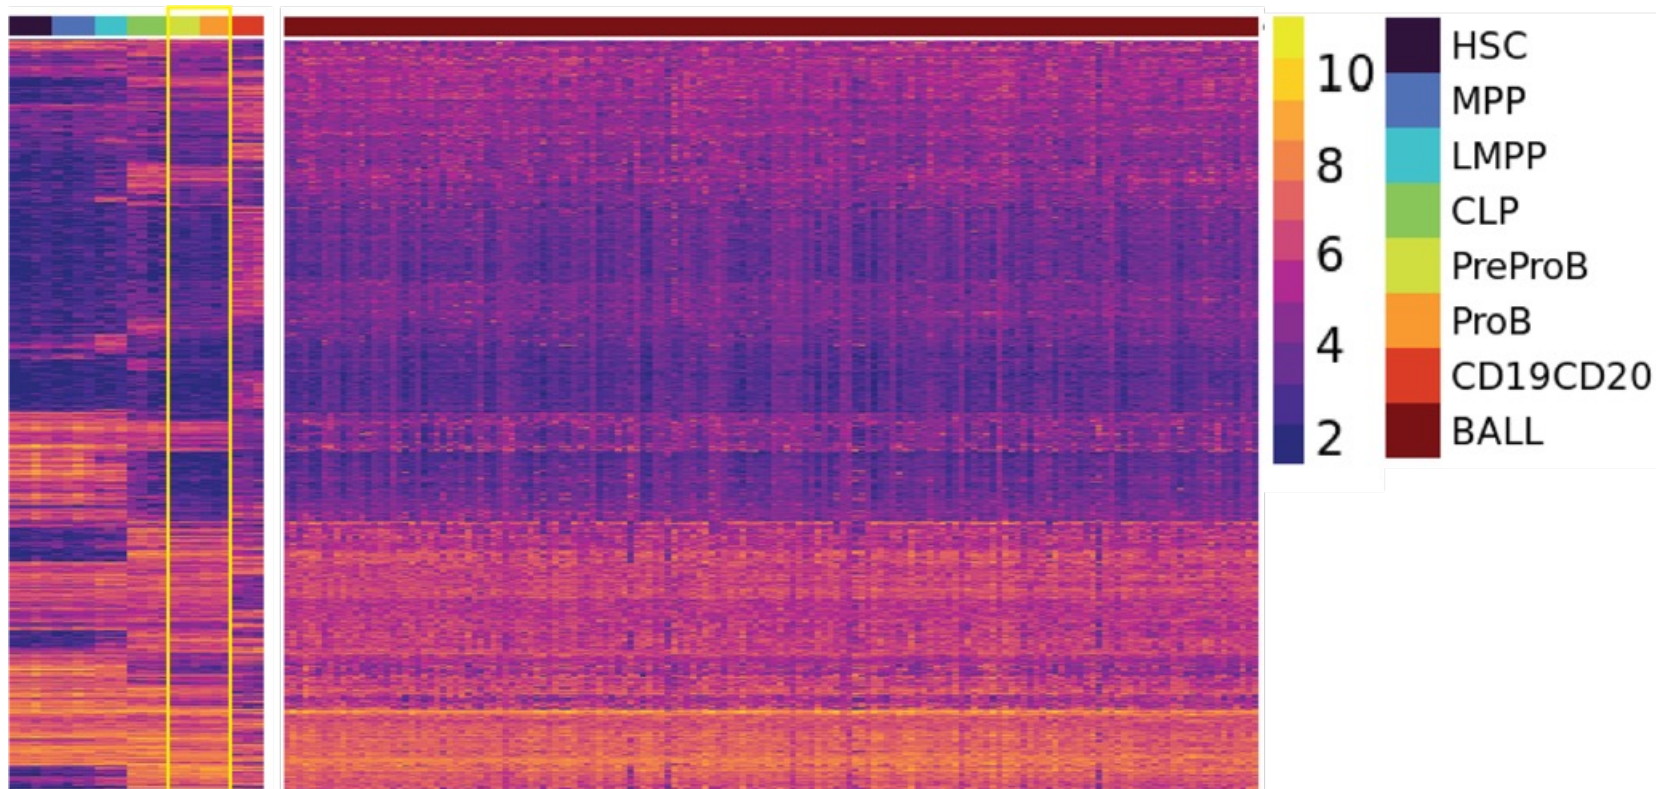

**C**

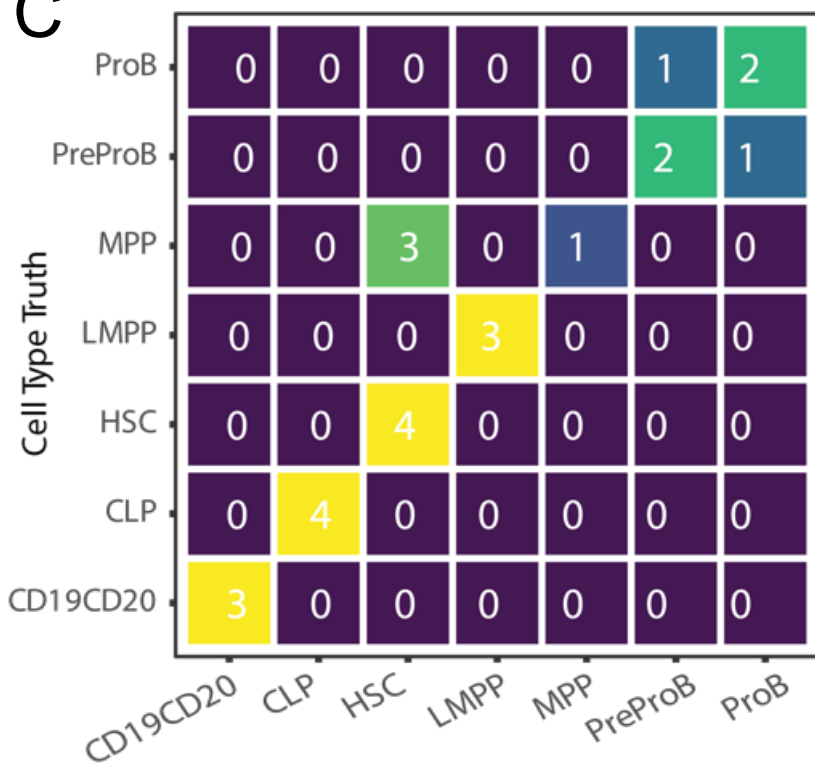

**D**

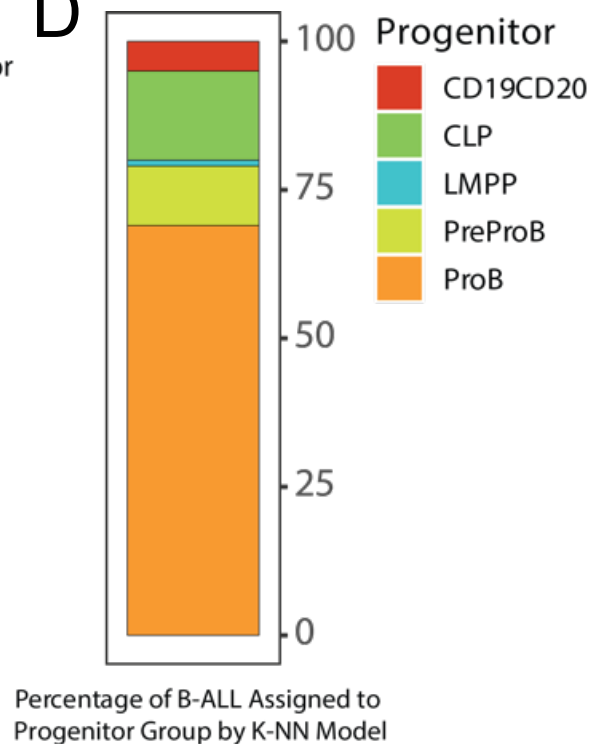

**Figure 2**

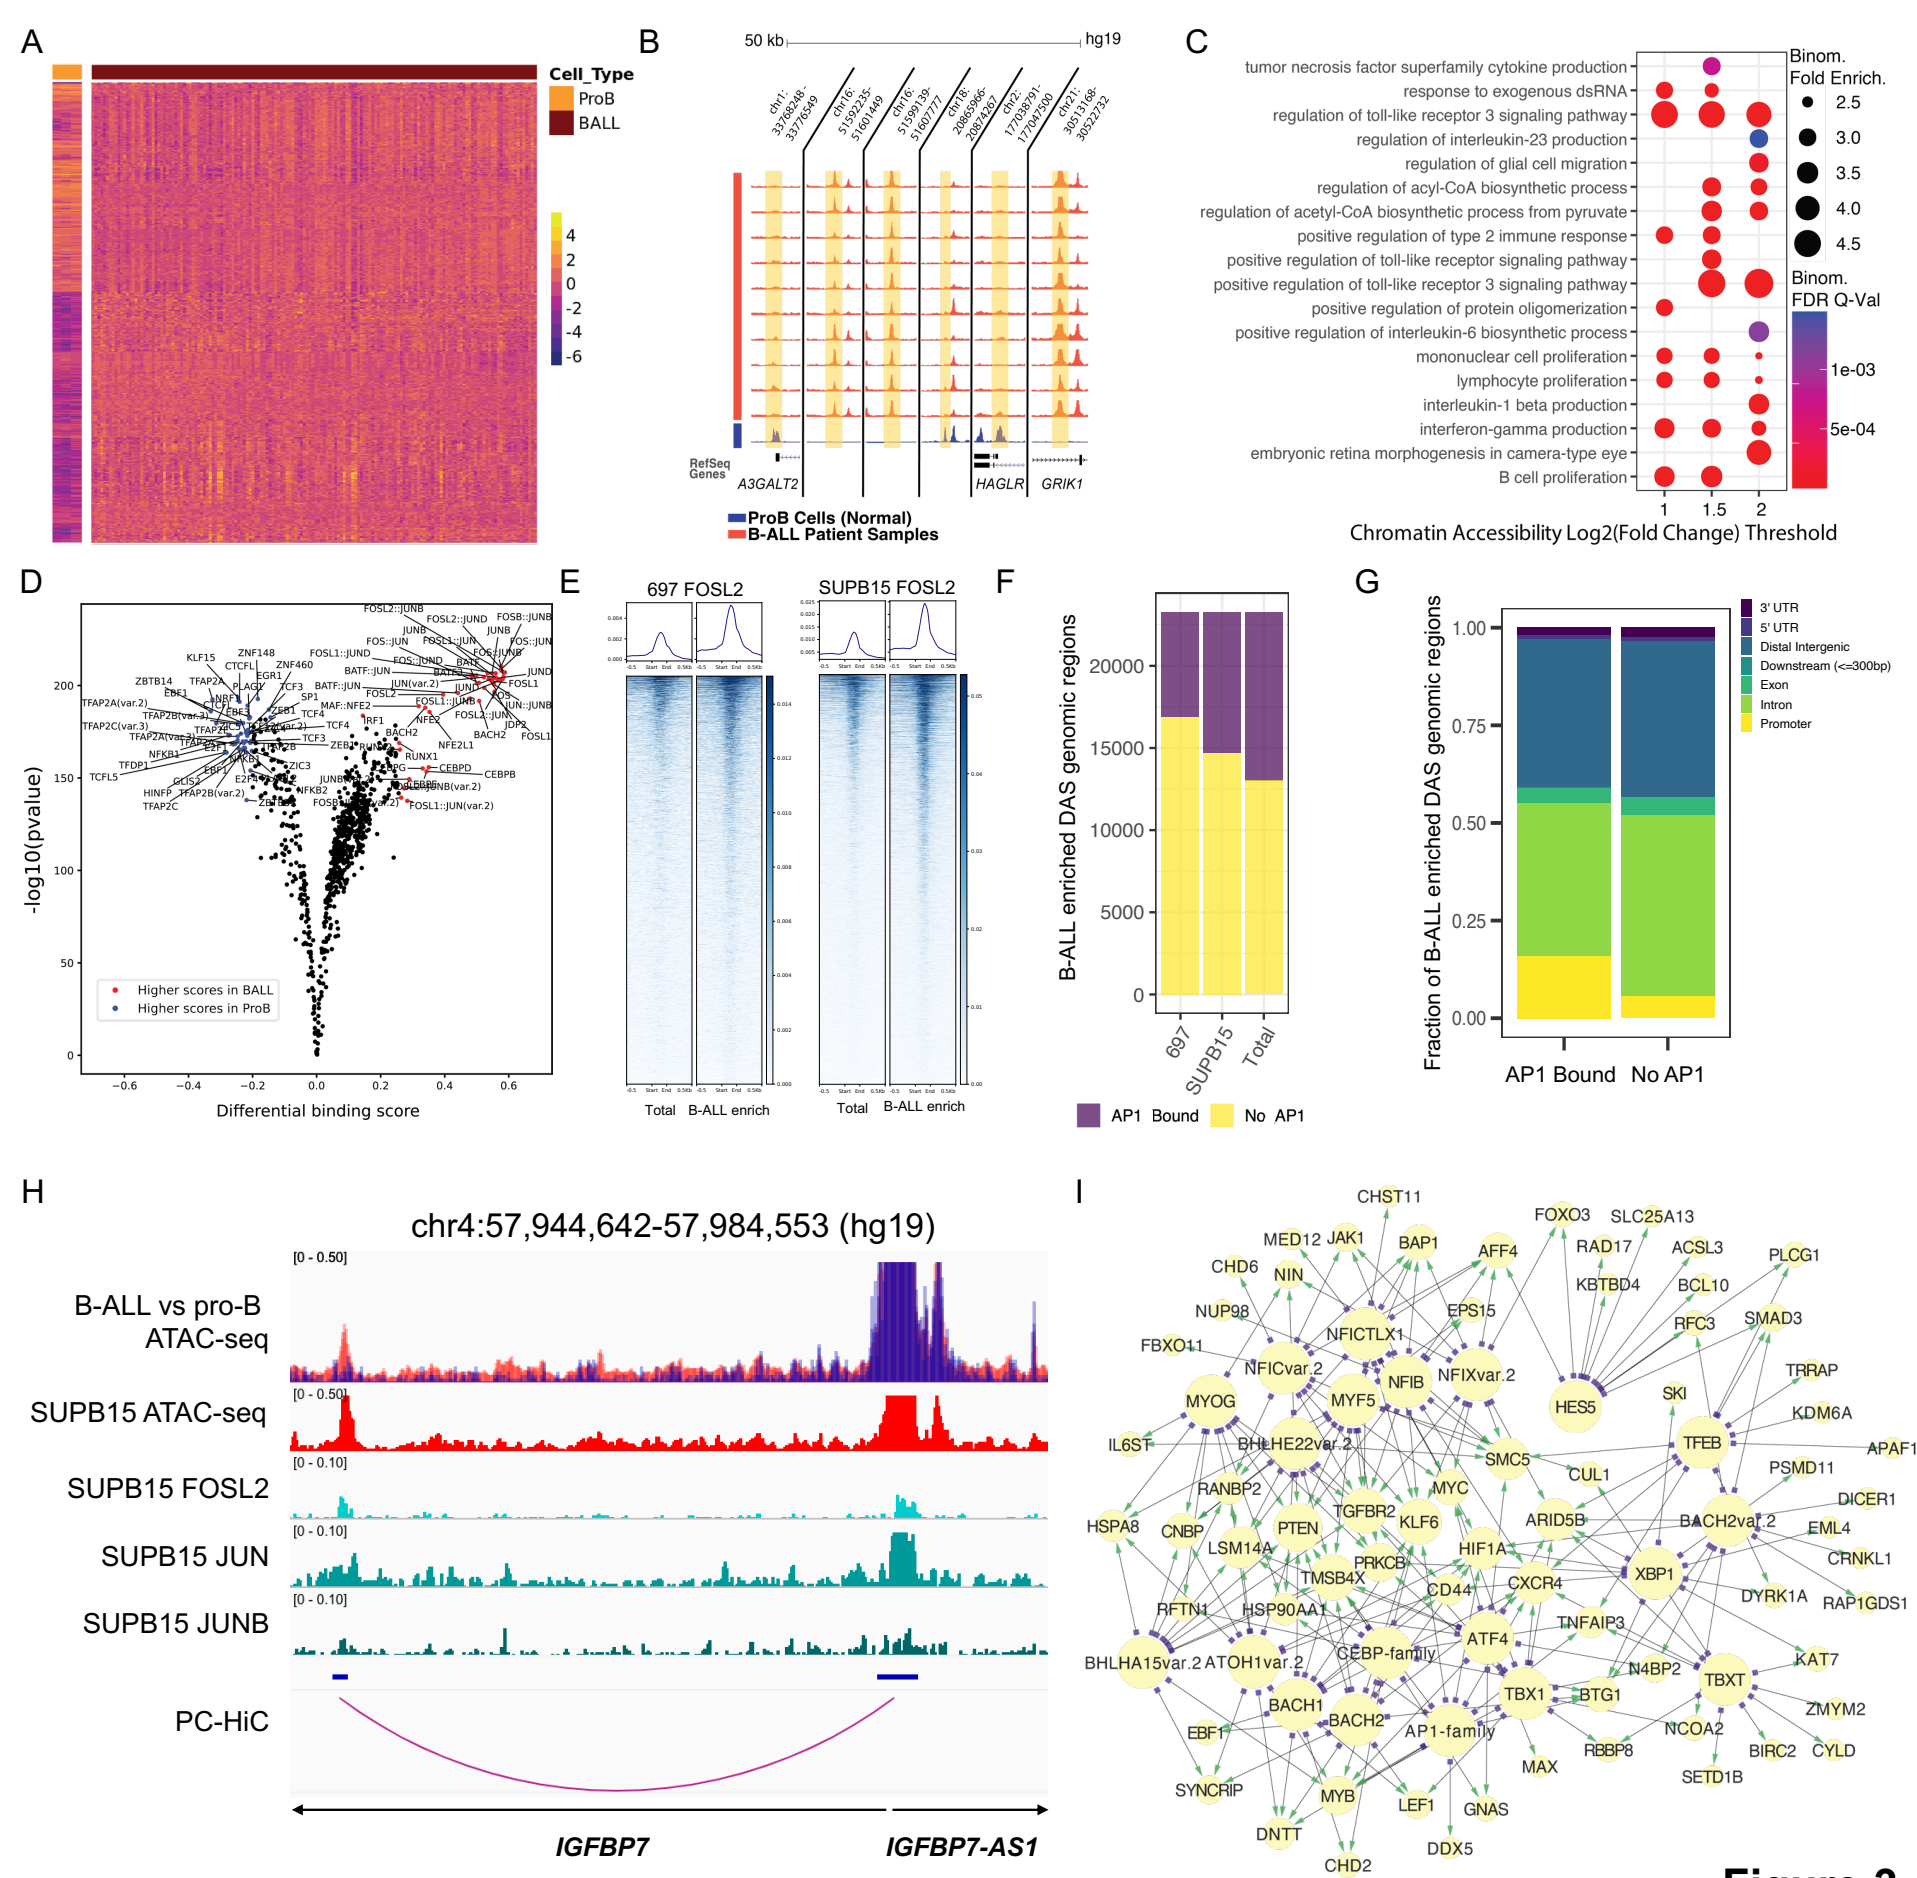

**Figure 3**



**A**

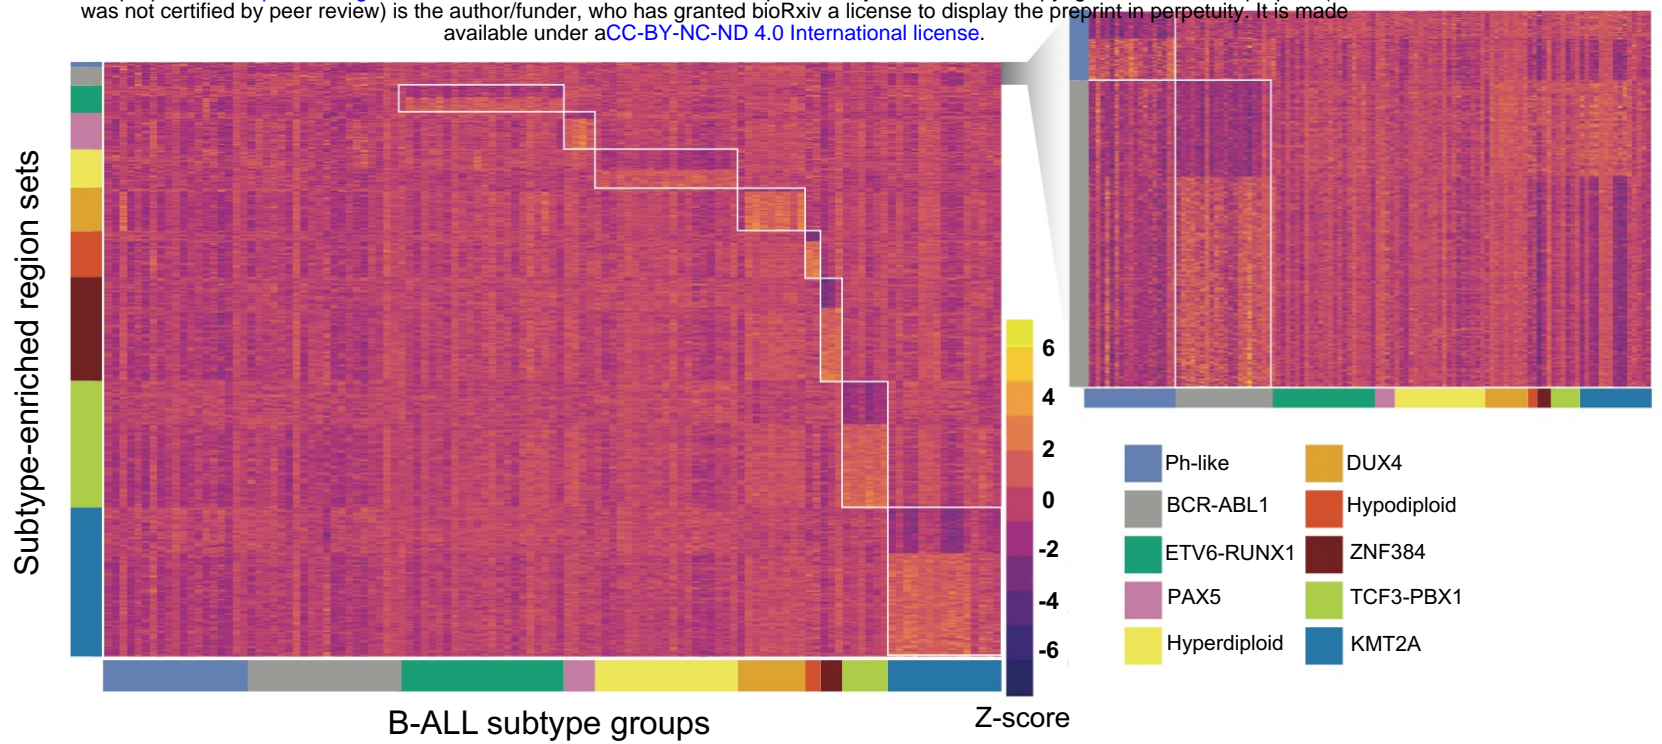

**B**

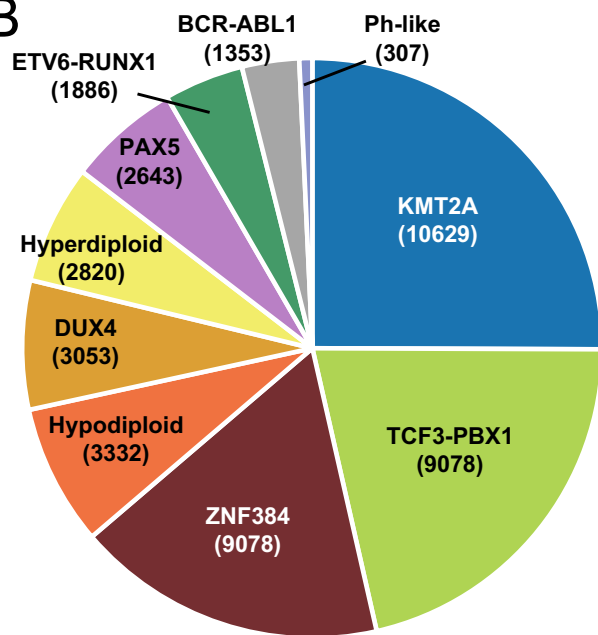

**C**

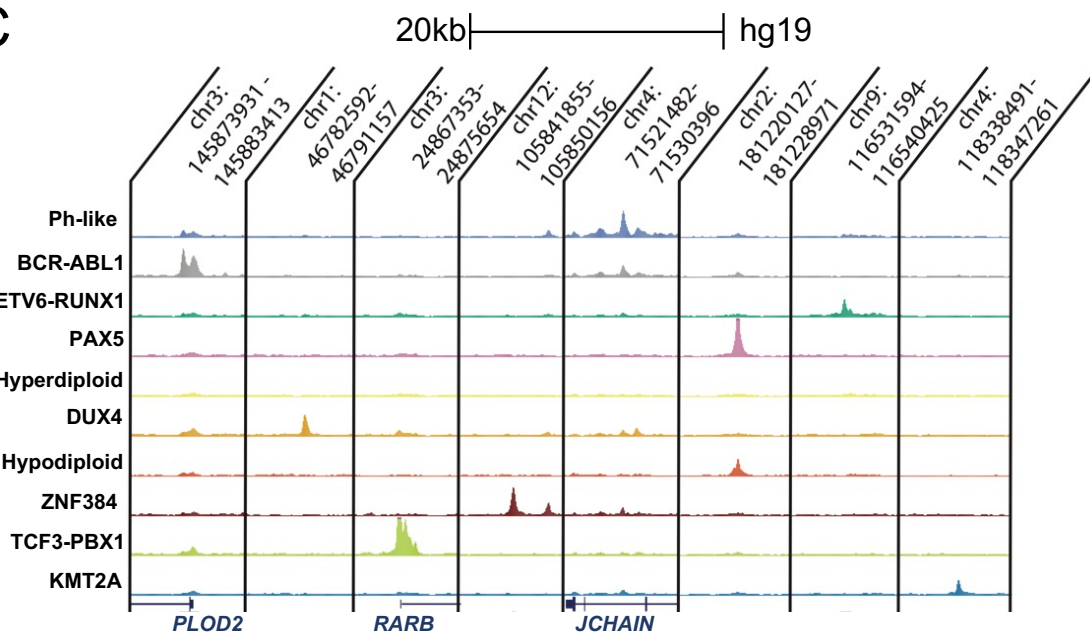

**D**

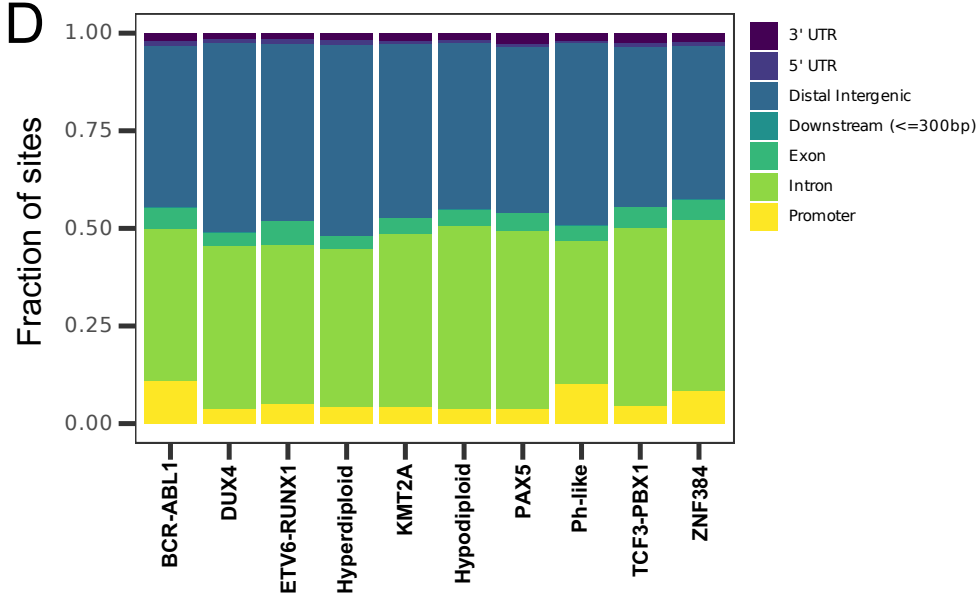

**E**

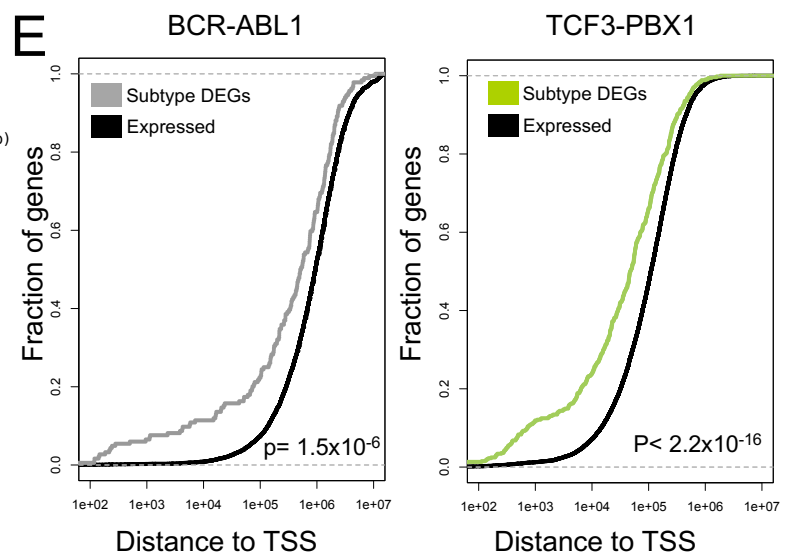

**Figure 4**

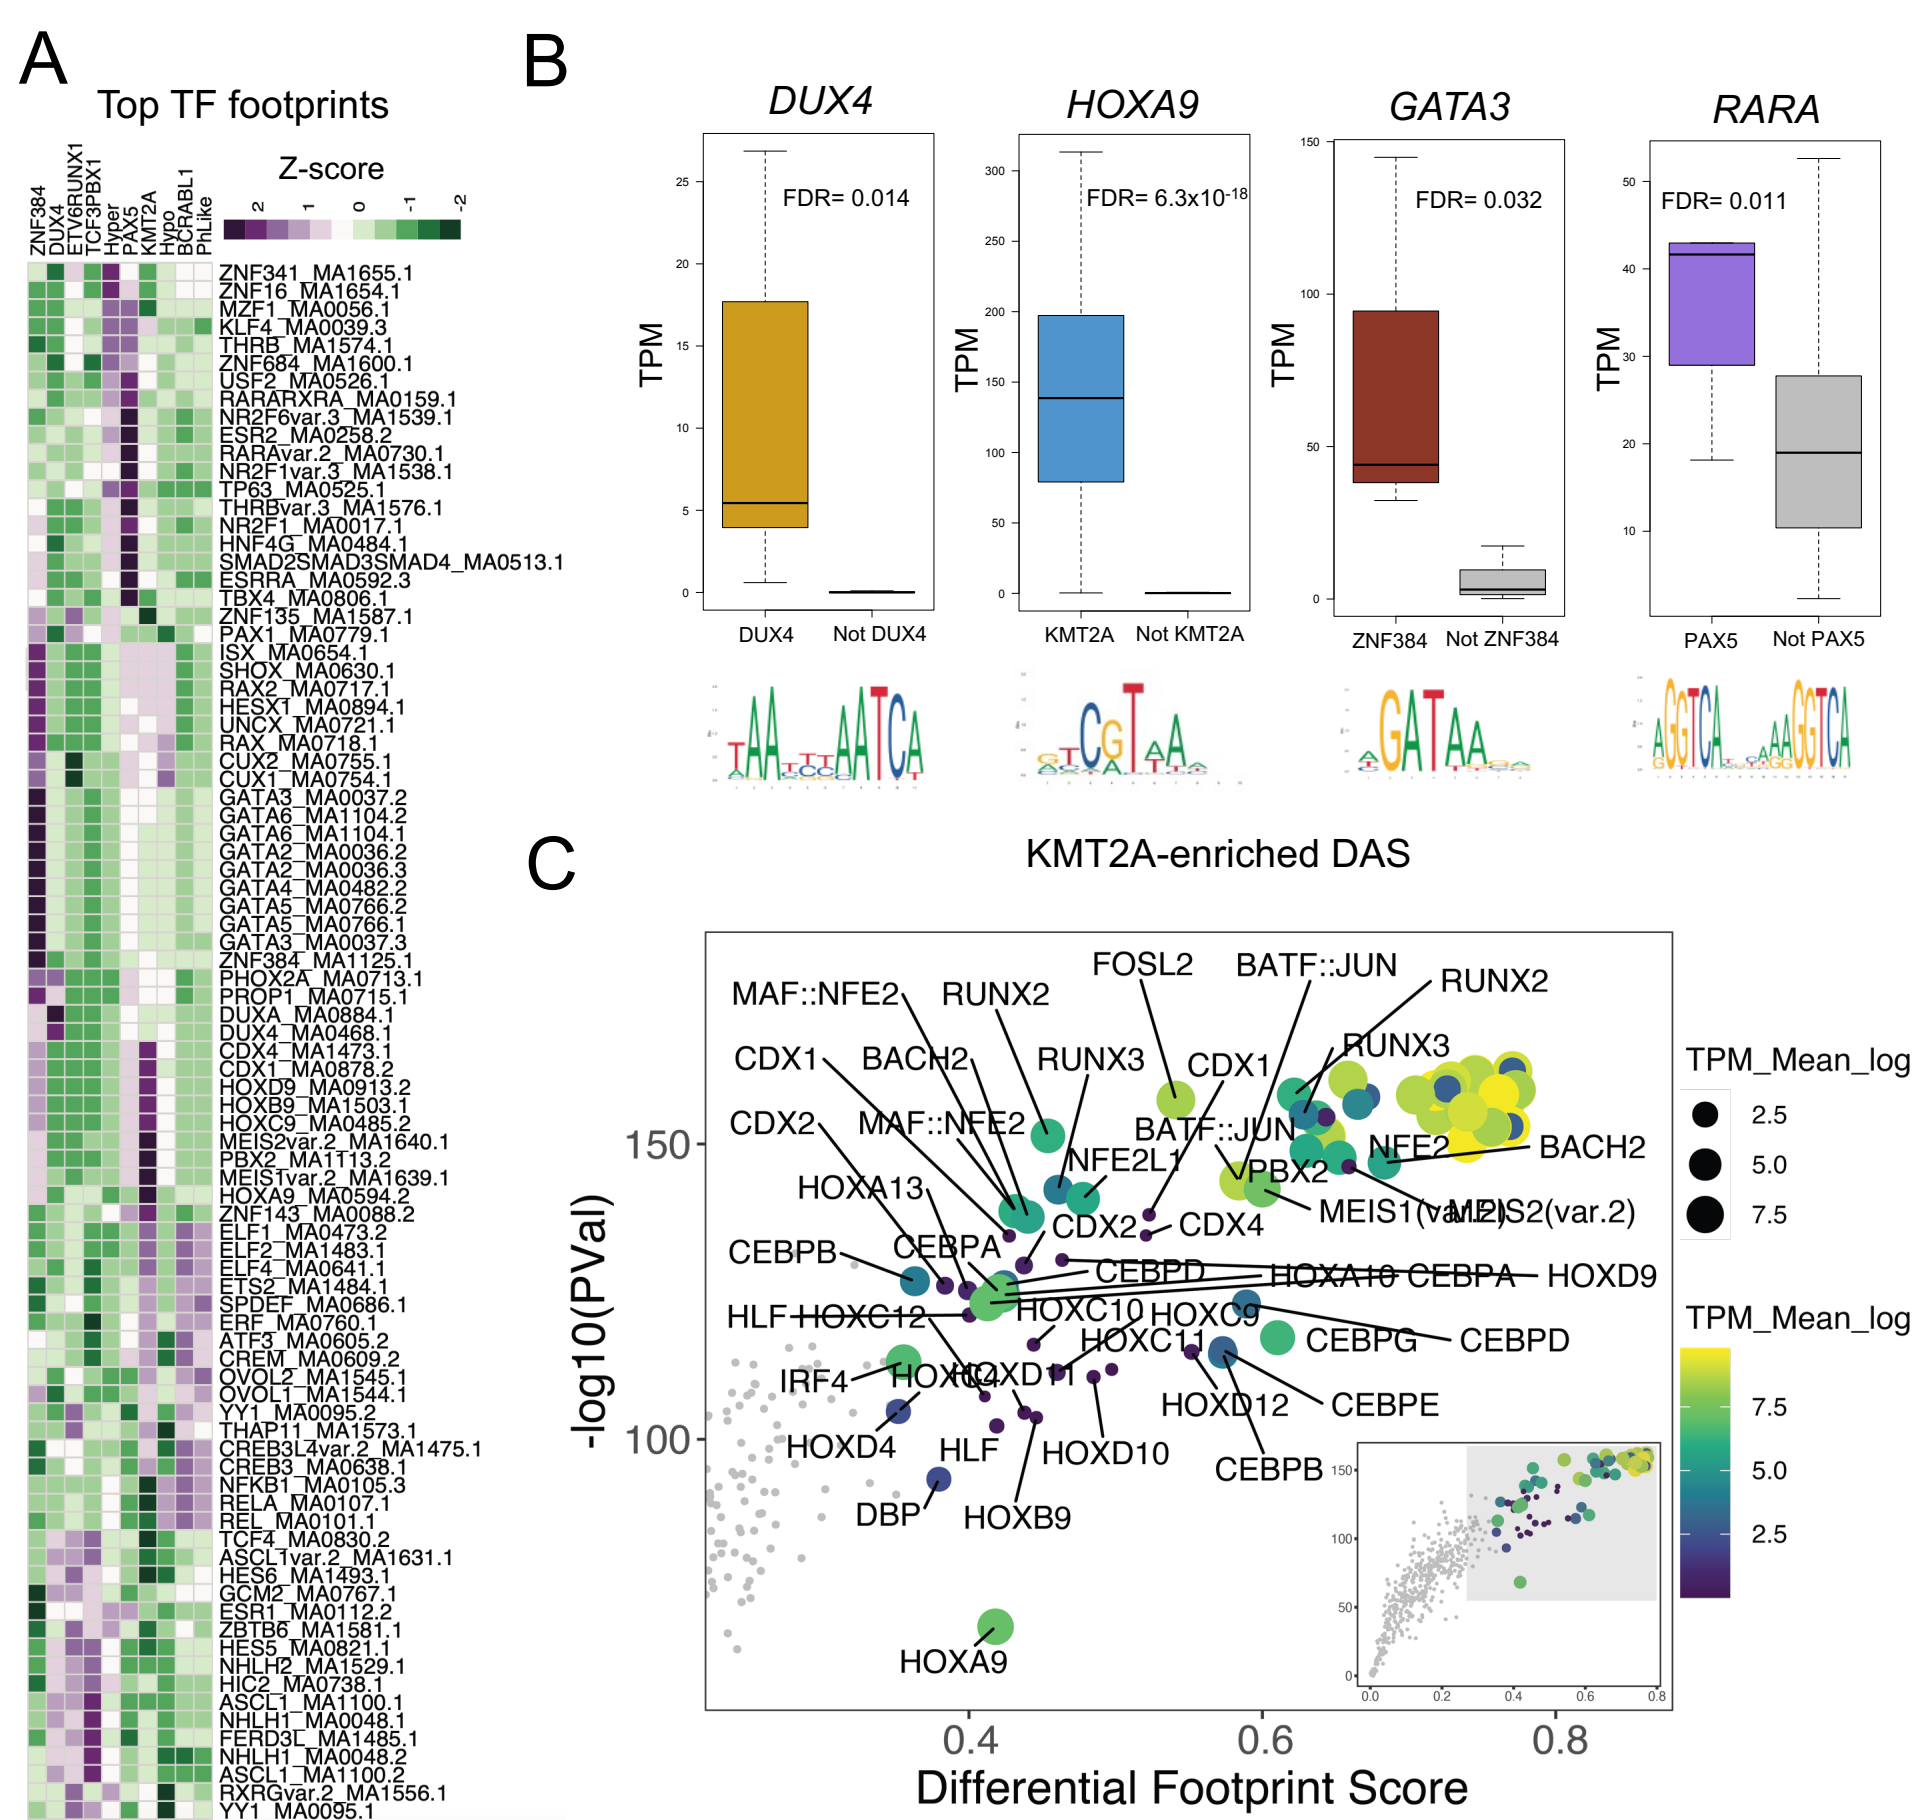

**A**

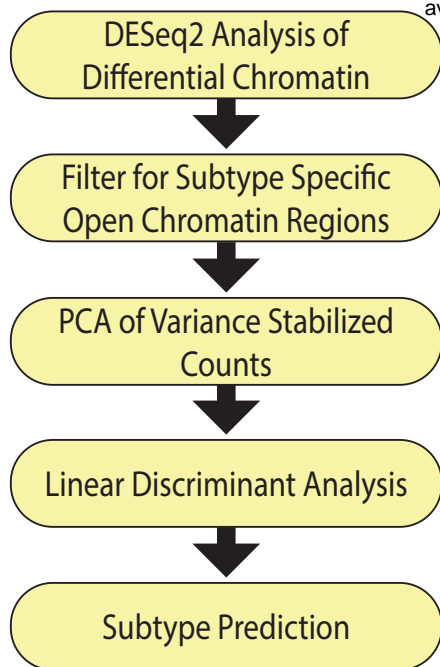

**B**

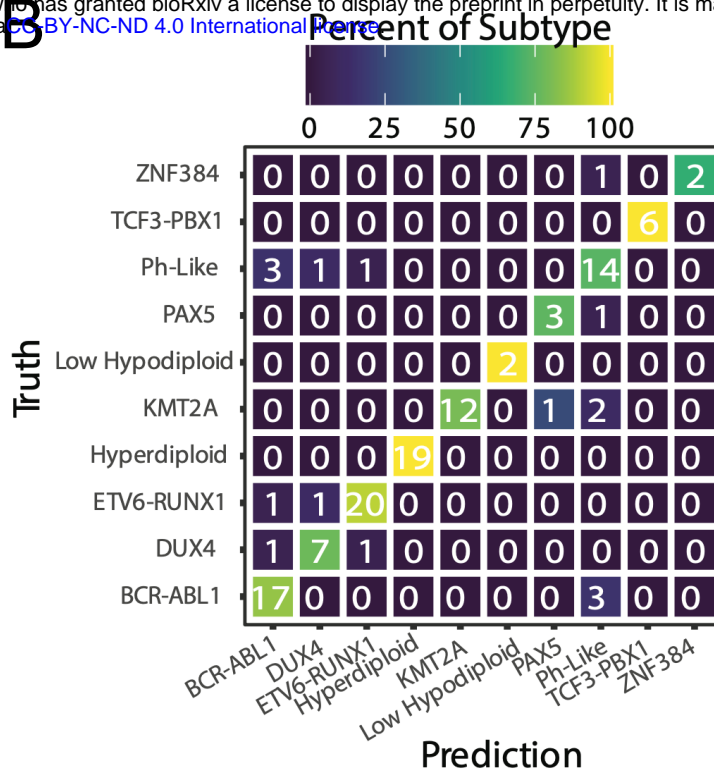

**C**

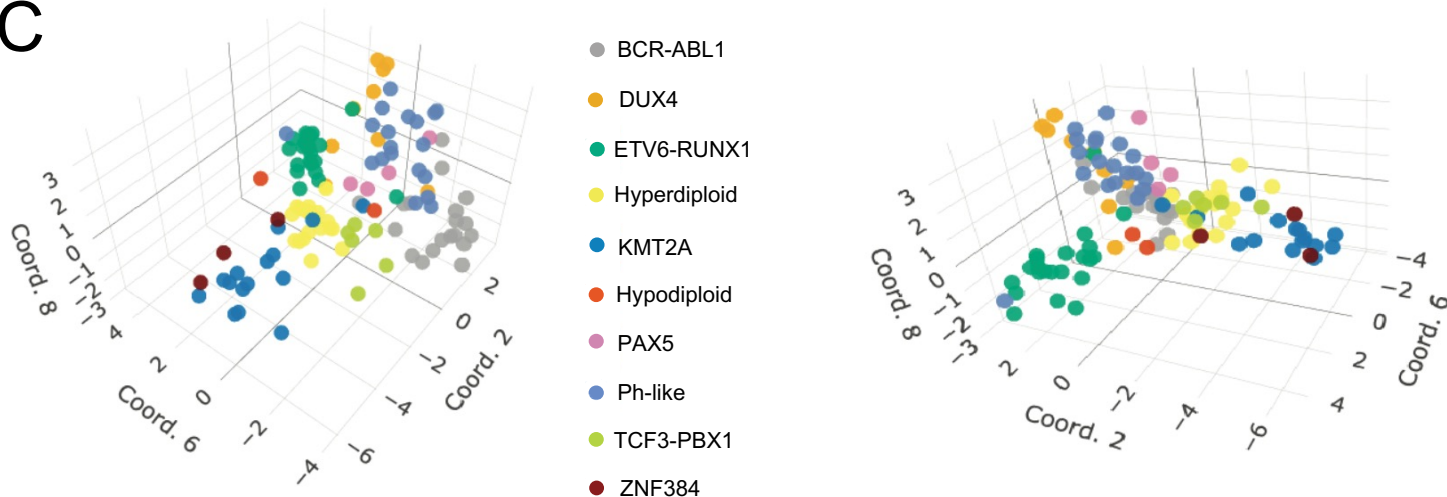

**D**

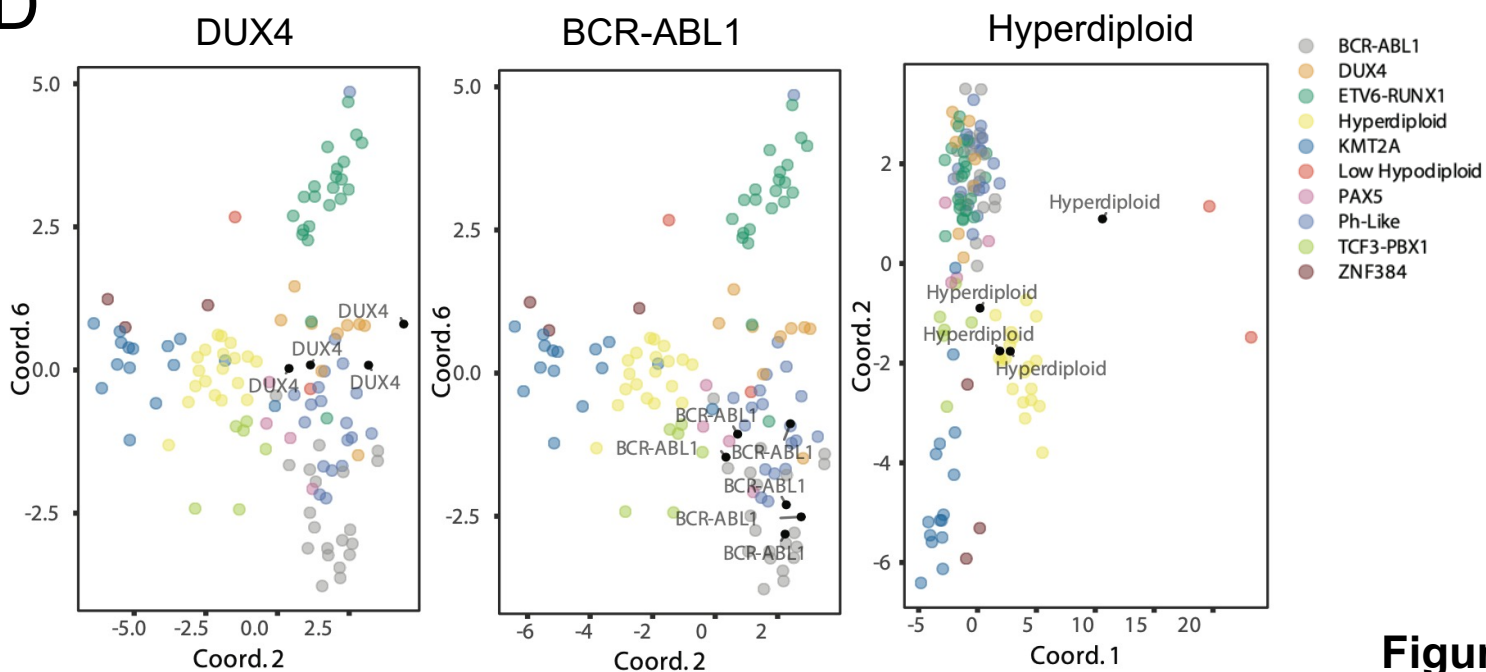

**Figure 6**

### A ATAC-QTL effect size

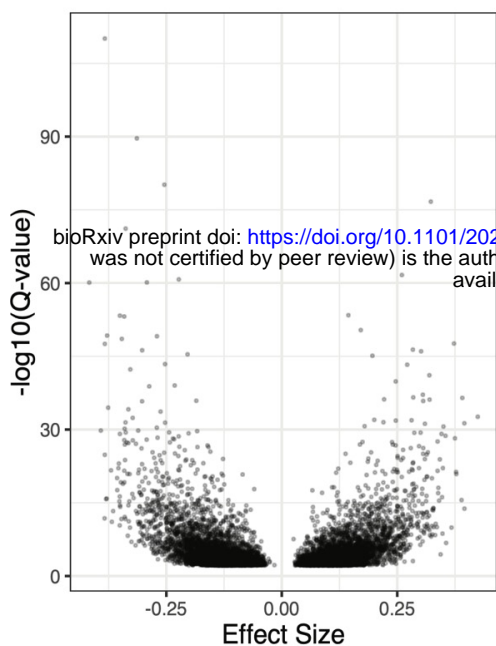

### B ATAC-QTL allele-specific activity

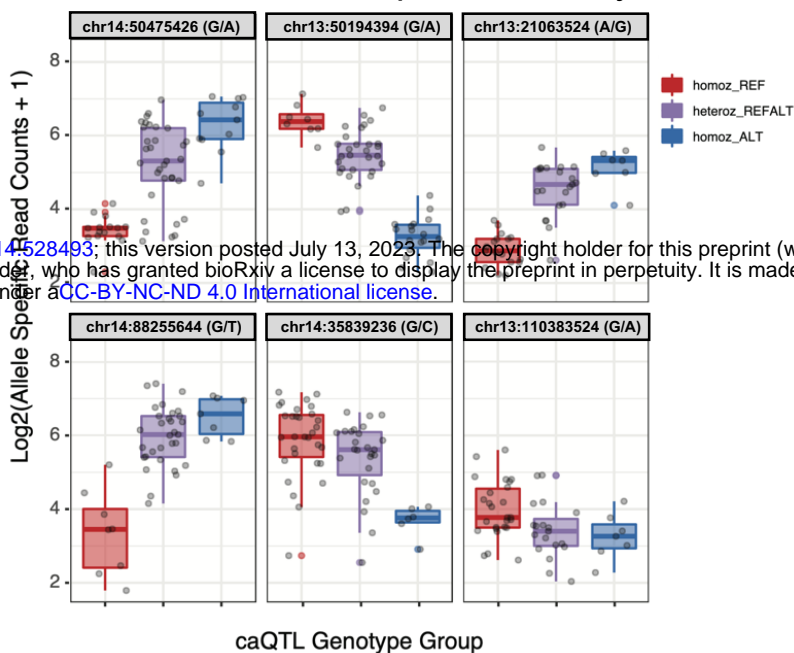

### C

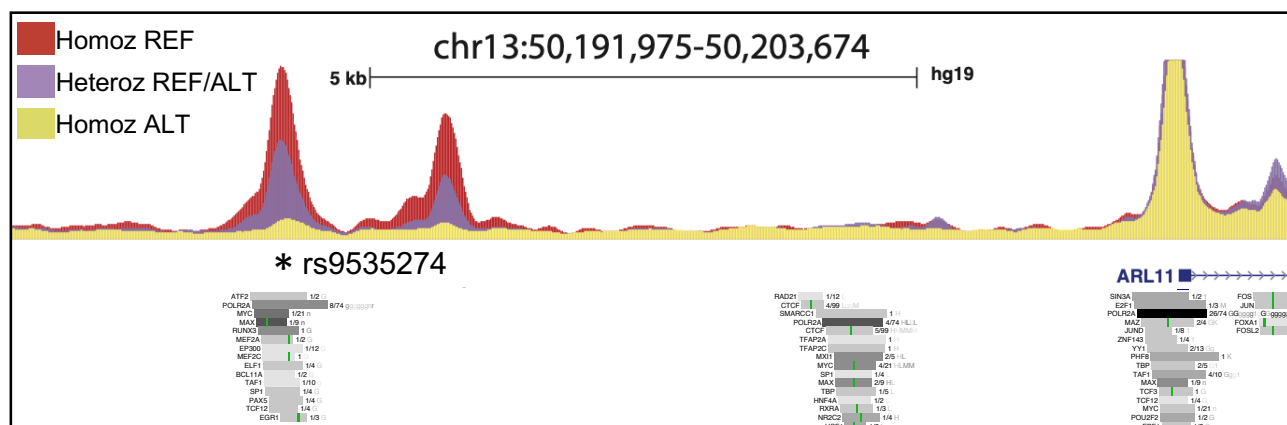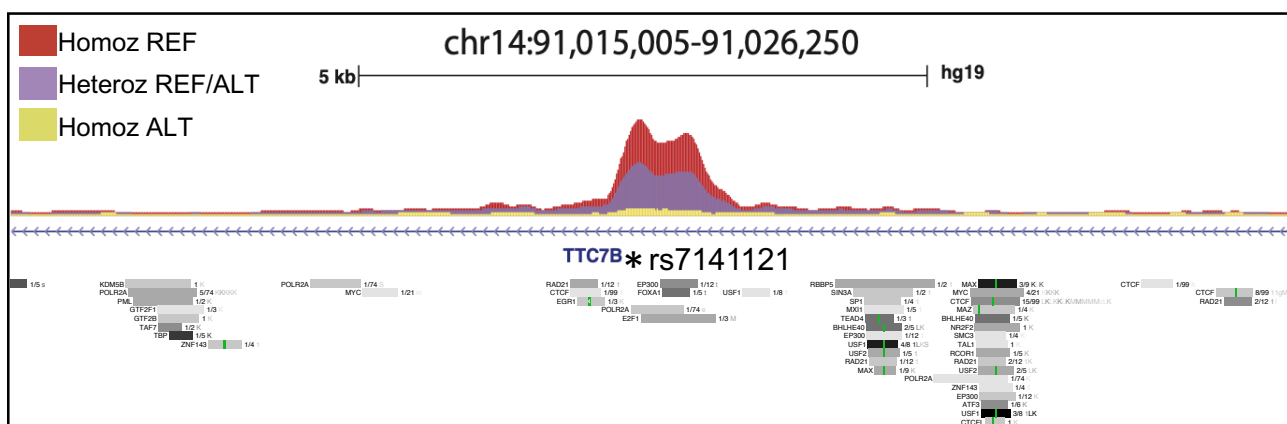

### D

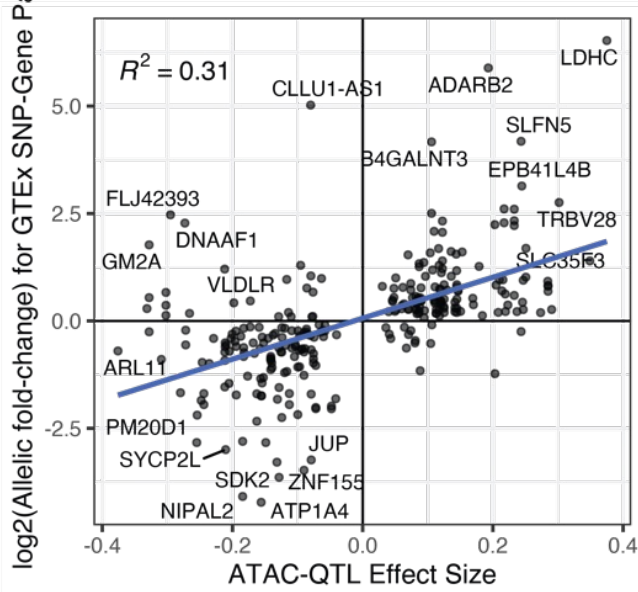

### E

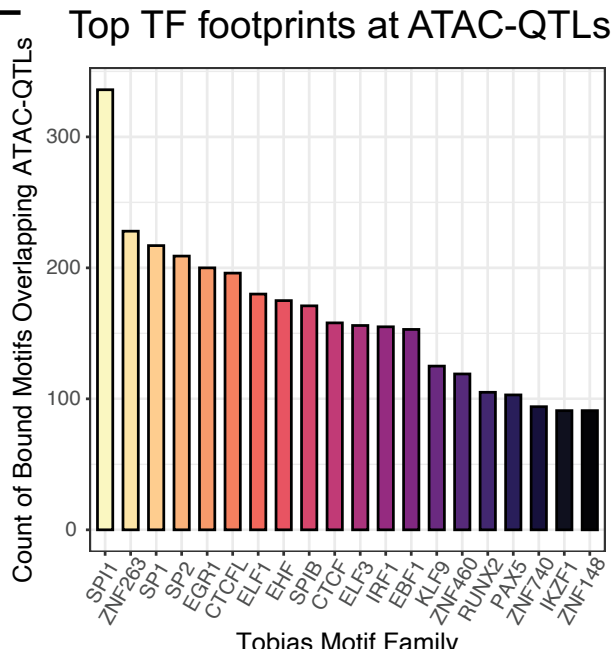

Figure 7
